# Supplementary material for: DBU Promoted Polysubstituted Arene Formation via a Michael Addition/Cyclization/Elimination Cascade Reaction
Source: MDPI journal article supplement (doi:10.3390/molecules27238167), 2022-11-23
Supplement: s1 [file s1]

# DBU Promoted Polysubstituted Arene Formation via a Michael Addition/Cyclization/Elimination Cascade Reaction

Guishun Bai <sup>1</sup>, Yang Yang <sup>1</sup>, Xingyue Wang <sup>1</sup>, Jiamin Wu <sup>1</sup>, Hong Wang <sup>1,2,3,\*</sup>, Xinyi Ye <sup>1,2,3,\*</sup> and Xiaoze Bao <sup>1,2,3,\*</sup>

<sup>1</sup> College of Pharmaceutical Science & Collaborative Innovation Center of Yangtze River Delta Region Green Pharmaceuticals, Zhejiang University of Technology, Hangzhou 310014, China; baiguishun@gmail.com (G.B.); 15550813128@163.com (Y.Y.); wangxingyue9@163.com (X.W.); WJM97830@163.com (J.W.)

<sup>2</sup> Zhejiang International Sci-Tech Cooperation Base for the Exploitation and Utilization of Nature Product, Hangzhou 310014, China

<sup>3</sup> Key Laboratory of Marine Fishery Resources Exploitation & Utilization of Zhejiang Province, Hangzhou 310014, China

\* Correspondence: hongw@zjut.edu.cn (H.W.); xinyiye1020@zjut.edu.cn (X.Y.); baoxiaoze@zjut.edu.cn (X.B.)

## Contents:

1. General information
2. Experimental procedures and characterization of products **7aa-7qa**, **7ab-7ai**
3. NMR spectra for compounds
4. Reference

## 1. General information

Unless otherwise noted, materials were purchased from commercial suppliers and used without further purification. Column chromatography was performed on silica gel (200–300 mesh). All <sup>1</sup>H NMR spectra were recorded on a Bruker AvanceII 500 MHz or Bruker AvanceII400 MHz respectively, <sup>13</sup>C NMR spectra were recorded on a Bruker AvanceII 101 MHz or Bruker Avance III 126 MHz with chemical shifts reported as ppm (in CDCl<sub>3</sub> or DMSO-d<sub>6</sub>, TMS as internal standard). Data for <sup>1</sup>H NMR are recorded as follows: chemical shift (δ, ppm), multiplicity (s = singlet, d = doublet, t = triplet, m = multiplet, br = broad singlet, dd = doublet doublet, coupling constants in Hz, integration). HRMS (ESI) was obtained with a HRMS/MS instrument (LTQ Orbitrap XL TM).

Vinylogous malononitrile derivative **3** were prepared according to the literature<sup>[1]</sup>. Chloronitroalkenes **1** were prepared from various substituted aldehyde according to the literature<sup>[2]</sup>. Catalysts **Cat.5-10** were synthesized according to literature procedures<sup>[3-4]</sup>.

## 2. Experimental procedures and characterization of products

*General procedure : synthesis of compound 7aa-7qa, 7ab-7ai*

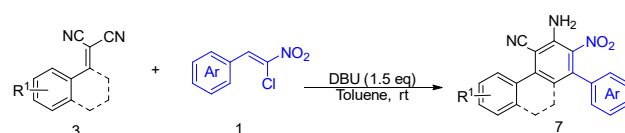

Vinylogous malononitrile derivative **3** (0.2 mmol), chloronitroolefins **1** (0.24 mmol, 1.2equiv) were added to a reaction tube, 2mL toluene were added and the mixture was stirred at rt. DBU (0.3mmol, 1.5 equiv) was added *via* a microsyringe, then the mixture was stirred at room temperature for 15 minutes. The reaction mixture was purified by column chromatography on silica gel directly to give the product **7**.

## Enantioselective synthesis of compound 7ka

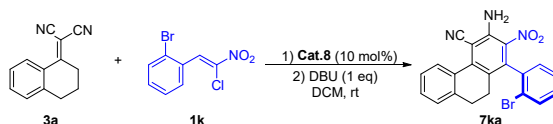

The mixture of  $\alpha,\alpha$ -dicyanoolefins **3a** (0.10 mmol), chloronitroolefins **1k** (0.12 mmol), and catalyst **Cat.7** (10 mol %) in DCM (1.0 mL) was stirred for 12 hours at room temperature. After then, DBU (0.1 mmol) was added and stirred for another 40 minutes. The reaction mixture was purified by column chromatography on silica gel directly to give the chiral product **7ka**.

## 4. -isocyano-2-nitro-1-phenyl-9,10-dihydrophenanthren-3-amine (7aa)

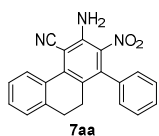

Prepared according to the general procedure as yellow solid (64 mg, 95% yield) after silica gel chromatography (petroleum ether/EtOAc = 10:1).  $^1\text{H}$  NMR (500 MHz,  $\text{CDCl}_3$ )  $\delta$  8.34–8.16 (m, 1H), 7.55–7.30 (m, 6H), 7.25–7.20 (m, 2H), 5.69 (s, 2H), 2.66 (dd,  $J$  = 8.3, 5.3 Hz, 2H), 2.47–2.34 (m, 2H).  $^{13}\text{C}$  NMR (101 MHz,  $\text{CDCl}_3$ )  $\delta$  143.3, 142.6, 140.37, 139.81, 135.68, 131.13, 130.52, 128.81, 128.59, 128.19, 128.03, 127.96, 127.45, 127.12, 117.24, 95.36, 29.06, 25.99. HRMS (ESI)  $m/z$  Calcd. for  $\text{C}_{21}\text{H}_{16}\text{N}_3\text{O}_2^+$  ( $[\text{M}+\text{H}]^+$ ) 342.1237, Found 342.1244.

## 4. -isocyano-2-nitro-1-(p-tolyl)-9,10-dihydrophenanthren-3-amine (7ba)

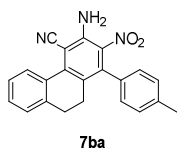

Prepared according to the general procedure as yellow solid (64 mg, 92% yield) after silica gel chromatography (petroleum ether/EtOAc = 10:1).  $^1\text{H}$  NMR (400 MHz,  $\text{CDCl}_3$ )  $\delta$  8.41–8.06 (m, 1H), 7.46–7.35 (m, 2H), 7.31–7.26 (m, 1H), 7.24 (s, 2H), 7.13–7.03 (m, 2H), 5.60 (s, 2H), 2.652.61 (m, 2H), 2.43–2.38 (m, 2H), 2.40 (s, 3H).  $^{13}\text{C}$  NMR (101 MHz,  $\text{CDCl}_3$ )  $\delta$  143.12, 142.35, 140.38, 139.75, 138.52, 135.79, 132.54, 131.17, 130.40, 129.49, 128.31, 127.88, 127.39, 127.06, 117.24, 95.14, 29.05, 25.96, 21.35. HRMS (ESI)  $m/z$  Calcd. for  $\text{C}_{22}\text{H}_{18}\text{N}_3\text{O}_2^+$  ( $[\text{M}+\text{H}]^+$ ) 356.1394, Found 356.1395.

## 4. -isocyano-1-(4-methoxyphenyl)-2-nitro-9,10-dihydrophenanthren-3-amine (7ca)

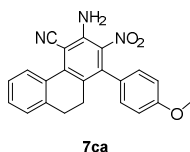

Prepared according to the general procedure as yellow solid (62 mg, 85% yield) after silica gel chromatography (petroleum ether/EtOAc = 10:1).  $^1\text{H}$  NMR (400 MHz, DMSO)  $\delta$  8.17–8.07 (m, 1H), 7.47–7.30 (m, 3H), 7.27–6.89 (m, 4H), 6.39 (s, 2H), 3.80 (s, 3H), 2.65–2.57 (m, 2H), 2.31–2.22 (m, 2H).  $^{13}\text{C}$  NMR (101 MHz, DMSO)  $\delta$  159.81, 143.03, 141.06, 140.22, 138.59, 137.25, 131.40, 130.48, 130.09, 128.37, 127.55, 127.07, 126.98, 126.96, 117.65, 114.53,

94.22, 55.62, 28.75, 25.98. HRMS (ESI)  $m/z$  Calcd. for  $C_{22}H_{18}N_3O_3^+([M+H]^+)$  372.1343, Found 372.1347.

methyl 4-(3-amino-4-isocyano-2-nitro-9,10-dihydrophenanthren-1-yl)benzoate (7da)

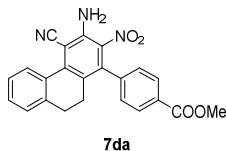

Prepared according to the general procedure as yellow solid (64 mg, 81% yield) after silica gel chromatography (petroleum ether/EtOAc = 10:1).  $^1H$  NMR (400 MHz,  $CDCl_3$ )  $\delta$  8.32–8.19 (m, 1H), 8.18–8.02 (m, 2H), 7.47–7.36 (m, 2H), 7.33–7.27 (m, 3H), 5.84 (s, 2H), 3.95 (s, 3H), 2.64–2.63 (m, 2H), 2.44–2.23 (m, 2H).  $^{13}C$  NMR (101 MHz,  $CDCl_3$ )  $\delta$  166.52, 143.74, 143.10, 140.74, 139.77, 139.57, 134.65, 130.88, 130.75, 130.25, 130.07, 128.14, 127.99, 127.76, 127.52, 127.20, 117.03, 95.90, 52.36, 28.94, 25.96. HRMS (ESI)  $m/z$  Calcd. for  $C_{23}H_{18}N_3O_4^+([M+H]^+)$  400.1292, Found 400.1297.

1. -(4-fluorophenyl)-4-isocyano-2-nitro-9,10-dihydrophenanthren-3-amine (7ea)

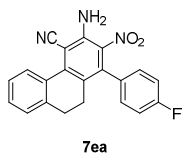

Prepared according to the general procedure as yellow solid (64 mg, 91% yield) after silica gel chromatography (petroleum ether/EtOAc = 10:1).  $^1H$  NMR (400 MHz,  $CDCl_3$ )  $\delta$  8.37–8.06 (m, 1H), 7.48–7.34 (m, 2H), 7.28–7.29 (m, 1H), 7.23–7.07 (m, 4H), 5.68 (s, 2H), 2.79–2.47 (m, 2H), 2.47–2.17 (m, 2H).  $^{13}C$  NMR (101 MHz,  $CDCl_3$ )  $\delta$  162.72 (d,  $J$  = 249.47 Hz), 143.31, 142.67, 139.69, 139.28, 131.50 (d,  $J$  = 3.7 Hz), 130.99, 130.59, 129.90, 129.82, 128.23, 127.94, 127.44, 127.15, 117.09, 115.99, (d,  $J$  = 22.2 Hz) 95.58, 28.98, 25.94. HRMS (ESI)  $m/z$  Calcd. for  $C_{21}H_{15}FN_3O_2^+([M+H]^+)$  360.1143, Found 360.1151.

1. -(4-chlorophenyl)-4-isocyano-2-nitro-9,10-dihydrophenanthren-3-amine (7fa)

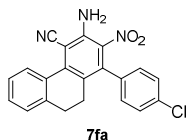

Prepared according to the general procedure as yellow solid (73 mg, 97% yield) after silica gel chromatography (petroleum ether/EtOAc = 10:1).  $^1H$  NMR (500 MHz,  $CDCl_3$ )  $\delta$  8.33–8.15 (m, 1H), 7.49–7.39 (m, 4H), 7.33–7.28 (m, 1H), 7.20–7.12 (m, 2H), 5.76 (s, 2H), 2.78–2.57 (m, 2H), 2.48–2.22 (m, 2H).  $^{13}C$  NMR (101 MHz,  $CDCl_3$ )  $\delta$  143.46, 142.83, 139.69, 139.16, 135.10, 134.69, 134.16, 130.92, 130.64, 129.38, 129.12, 128.01, 127.95, 127.45, 127.15, 117.04, 95.69, 28.93, 25.93. HRMS (ESI)  $m/z$  Calcd. for  $C_{21}H_{15}ClN_3O_2^+([M+H]^+)$  376.0847, Found 376.0854.

## 1. -(4-bromophenyl)-4-isocyano-2-nitro-9,10-dihydrophenanthren-3-amine (7ga)

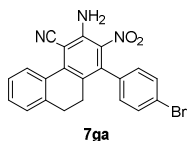

Prepared according to the general procedure as yellow solid (76 mg, 90% yield) after silica gel chromatography (petroleum ether/EtOAc = 10:1).  $^1\text{H}$  NMR (500 MHz,  $\text{CDCl}_3$ )  $\delta$  8.30–8.19 (m, 1H), 7.63–7.56 (m, 2H), 7.47–7.39 (m, 2H), 7.33–7.29 (m, 1H), 7.13–7.07 (m, 2H), 5.76 (s, 2H), 2.74–2.56 (m, 2H), 2.45–2.28 (m, 2H).  $^{13}\text{C}$  NMR (101 MHz,  $\text{CDCl}_3$ )  $\delta$  143.48, 139.69, 139.18, 134.68, 132.06, 130.91, 130.66, 129.64, 127.96, 127.64, 127.46, 127.16, 122.86, 117.03, 95.72, 28.93, 25.94. HRMS (ESI)  $m/z$  Calcd. for  $\text{C}_{21}\text{H}_{15}\text{BrN}_3\text{O}_2$  ( $[\text{M}+\text{H}]^+$ ) 420.0342, Found 420.0352.

## 4. -isocyano-2-nitro-1-(4-nitrophenyl)-9,10-dihydrophenanthren-3-amine (7ha)

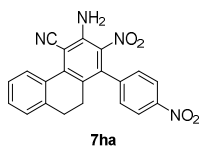

Prepared according to the general procedure as yellow solid (74 mg, 97% yield) after silica gel chromatography (petroleum ether/EtOAc = 10:1).  $^1\text{H}$  NMR (500 MHz,  $\text{CDCl}_3$ )  $\delta$  8.37–8.31 (m, 2H), 8.29–8.23 (m, 1H), 7.49–7.44 (m, 2H), 7.44–7.40 (m, 2H), 7.34–7.29 (m, 1H), 6.04 (s, 2H), 2.76–2.60 (m, 2H), 2.41–2.24 (m, 2H).  $^{13}\text{C}$  NMR (101 MHz,  $\text{CDCl}_3$ )  $\delta$  147.74, 144.16, 143.68, 143.15, 139.68, 138.41, 133.86, 131.03, 130.61, 129.08, 128.06, 127.60, 127.44, 127.31, 124.10, 116.79, 96.52, 28.82, 26.00. HRMS (ESI)  $m/z$  Calcd. for  $\text{C}_{21}\text{H}_{15}\text{N}_4\text{O}_4$  ( $[\text{M}+\text{H}]^+$ ) 387.1088, Found 387.1094.

## 4. -isocyano-2-nitro-1-(o-tolyl)-9,10-dihydrophenanthren-3-amine (7ia)

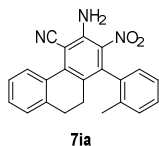

Prepared according to the general procedure as yellow solid (53 mg, 74% yield) after silica gel chromatography (petroleum ether/EtOAc = 10:1).  $^1\text{H}$  NMR (400 MHz,  $\text{CDCl}_3$ )  $\delta$  8.28 (dd,  $J$  = 7.4, 1.8 Hz, 1H), 7.41 (tt,  $J$  = 7.5, 5.9 Hz, 2H), 7.33–7.25 (m, 3H), 7.237.20 (m, 1H), 7.00 (d,  $J$  = 7.5 Hz, 1H), 5.72 (s, 2H), 2.65 (t,  $J$  = 6.8 Hz, 2H), 2.25 (td,  $J$  = 6.4, 3.3 Hz, 2H), 2.13 (s, 3H).  $^{13}\text{C}$  NMR (101 MHz,  $\text{CDCl}_3$ )  $\delta$  143.59, 142.25, 140.16, 139.90, 136.31, 135.33, 131.03, 130.48, 130.14, 128.63, 128.13, 127.97, 127.43, 127.31, 127.10, 126.14, 117.22, 95.29, 28.97, 25.19, 19.69. HRMS (ESI)  $m/z$  Calcd. for  $\text{C}_{22}\text{H}_{18}\text{N}_3\text{O}_2$  ( $[\text{M}+\text{H}]^+$ ) 356.1394, Found 356.1400.

## 1. -(2-chlorophenyl)-4-isocyano-2-nitro-9,10-dihydrophenanthren-3-amine (7ja)

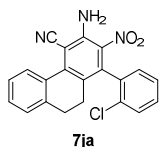

Prepared according to the general procedure as yellow solid (56 mg, 75% yield) after silica gel chromatography (petroleum ether/EtOAc = 10:1).  $^1\text{H}$  NMR (400 MHz,  $\text{CDCl}_3$ )  $\delta$  8.54–8.04 (m, 1H), 7.62–7.46 (m, 1H), 7.46–7.26 (m, 5H), 7.13 (dd,  $J$  = 7.4, 2.0 Hz, 1H), 5.99 (s, 2H), 2.79–2.57 (m, 2H), 2.47–2.12 (m, 2H).  $^{13}\text{C}$  NMR (101 MHz,  $\text{CDCl}_3$ )  $\delta$  144.20, 140.05, 133.25, 130.86, 130.69, 129.84, 129.69, 129.03, 128.39, 127.99, 127.54, 127.19, 127.12, 117.11, 28.87, 25.36. HRMS (ESI)  $m/z$  Calcd. for  $\text{C}_{21}\text{H}_{15}\text{ClN}_3\text{O}_2^+([\text{M}+\text{H}]^+)$  376.0847, Found 376.0855.

## 1. -(2-bromophenyl)-4-isocyano-2-nitro-9,10-dihydrophenanthren-3-amine (7ka)

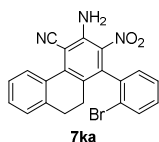

Prepared according to the general procedure as yellow solid (60 mg, 70% yield) after silica gel chromatography (petroleum ether/EtOAc = 10:1).  $^1\text{H}$  NMR (500 MHz,  $\text{CDCl}_3$ )  $\delta$  8.34–8.27 (m, 1H), 7.71 (dd,  $J$  = 8.0, 1.2 Hz, 1H), 7.50–7.36 (m, 3H), 7.35–7.28 (m, 2H), 7.15 (dd,  $J$  = 7.6, 1.7 Hz, 1H), 6.03 (s, 2H), 2.71 (qdd,  $J$  = 14.7, 8.6, 5.0 Hz, 2H), 2.47–2.14 (m, 2H).  $^{13}\text{C}$  NMR (126 MHz,  $\text{CDCl}_3$ )  $\delta$  144.26, 143.08, 140.10, 139.49, 137.40, 134.14, 132.84, 130.89, 130.71, 129.89, 129.13, 128.24, 128.00, 127.75, 127.54, 127.13, 123.19, 117.12, 96.11, 28.91, 25.48. HRMS (ESI)  $m/z$  Calcd. for  $\text{C}_{21}\text{H}_{15}\text{BrN}_3\text{O}_2^+([\text{M}+\text{H}]^+)$  420.0342, Found 420.0349. Enantiomeric excess was determined to be 40% (determined by HPLC using chiral IC column, hexane/2-propanol = 7/3,  $\lambda$  = 254 nm, 1.0 mL/min,  $t_{\text{major}}$  = 29.4 min,  $t_{\text{minor}}$  = 33.7 min).

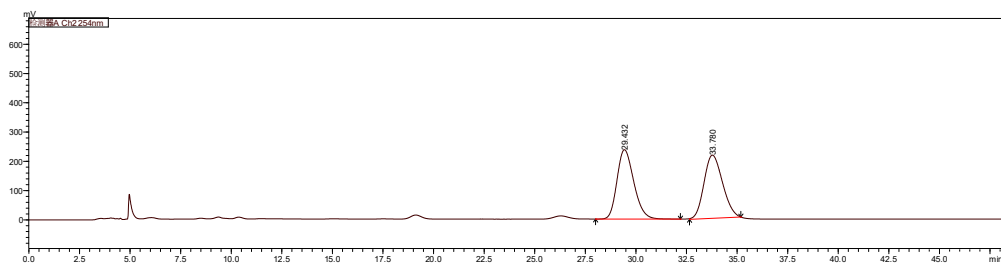

Detector A 254nm

| 峰号 | 保留时间   | 面积       | 高度     | 标记 | 浓度      | 浓度单位 | 化合物ID号 | 化合物名 | 面积%     |
|----|--------|----------|--------|----|---------|------|--------|------|---------|
| 1  | 29.432 | 13756612 | 237204 |    | 49.926  |      |        |      | 49.926  |
| 2  | 33.780 | 13797213 | 216014 | M  | 50.074  |      |        |      | 50.074  |
| 总计 |        | 27553826 | 453218 |    | 100.000 |      |        |      | 100.000 |

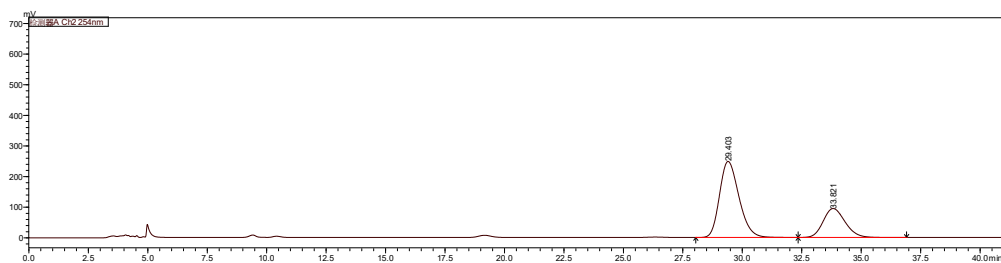

## Detector A 254nm

| 峰号 | 保留时间   | 面积       | 高度     | 标记 | 浓度      | 浓度单位 | 化合物ID号 | 化合物名 | 面积%     |
|----|--------|----------|--------|----|---------|------|--------|------|---------|
| 1  | 29.402 | 38694715 | 680368 | ■  | 69.941  |      |        |      | 69.941  |
| 2  | 33.820 | 16630336 | 260344 | ■  | 30.059  |      |        |      | 30.059  |
| 总计 |        | 55325051 | 940712 |    | 100.000 |      |        |      | 100.000 |

## 4. -isocyano-2-nitro-1-(m-tolyl)-9,10-dihydrophenanthren-3-amine (7ia)

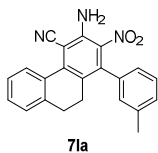

Prepared according to the general procedure as yellow solid (63 mg, 88% yield) after silica gel chromatography (petroleum ether/EtOAc = 10:1). <sup>1</sup>H NMR (400 MHz, CDCl<sub>3</sub>) δ 8.33–8.06 (m, 1H), 7.48–7.36 (m, 2H), 7.35–7.26 (m, 2H), 7.257.15 (m, 1H), 7.06–6.92 (m, 2H), 5.63 (s, 2H), 2.72–2.54 (m, 2H), 2.44–2.39 (m, 2H), 2.38 (s, 3H). <sup>13</sup>C NMR (101 MHz, CDCl<sub>3</sub>) δ 143.18, 142.41, 140.51, 139.78, 138.50, 135.58, 135.51, 131.14, 130.42, 129.33, 128.62, 128.45, 128.22, 127.89, 127.39, 127.06, 125.14, 117.23, 95.17, 29.05, 25.97, 21.48. HRMS (ESI) m/z Calcd. for C<sub>22</sub>H<sub>18</sub>N<sub>3</sub>O<sub>2</sub><sup>+</sup> ([M+H]<sup>+</sup>) 356.1394, Found 356.1401.

## 1. -(3-chlorophenyl)-4-isocyano-2-nitro-9,10-dihydrophenanthren-3-amine (7ma)

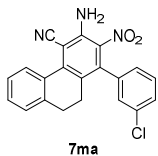

Prepared according to the general procedure as yellow solid (66 mg, 88% yield) after silica gel chromatography (petroleum ether/EtOAc = 10:1). <sup>1</sup>H NMR (400 MHz, CDCl<sub>3</sub>) δ 8.29–8.17 (m, 1H), 7.47–7.34 (m, 4H), 7.32–7.26 (m, 1H), 7.23–7.16 (m, 1H), 7.09 (dt, J = 6.5, 1.9 Hz, 1H), 5.79 (s, 2H), 2.73–2.59 (m, 2H), 2.45–2.26 (m, 2H). <sup>13</sup>C NMR (101 MHz, CDCl<sub>3</sub>) δ 143.58, 139.73, 138.90, 137.55, 134.82, 134.75, 130.87, 130.69, 130.10, 128.73, 128.06, 127.98, 127.96, 127.47, 127.16, 126.23, 117.01, 28.94, 25.95. HRMS (ESI) m/z Calcd. For C<sub>21</sub>H<sub>15</sub>ClN<sub>3</sub>O<sub>2</sub><sup>+</sup> ([M+H]<sup>+</sup>) 376.0847, Found 376.0856.

## 1. -(furan-3-yl)-4-isocyano-2-nitro-9,10-dihydrophenanthren-3-amine (7na)

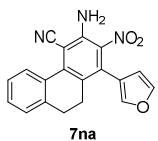

Prepared according to the general procedure as yellow solid (57 mg, 87% yield) after silica gel chromatography (petroleum ether/EtOAc = 10:1). <sup>1</sup>H NMR (400 MHz, CDCl<sub>3</sub>) δ 8.25–8.05 (m, 1H), 7.54 (d, J = 1.8 Hz, 1H), 7.46–7.37 (m, 2H), 7.35–7.27 (m, 1H), 6.61–6.45 (m, 2H), 5.77 (s, 2H), 2.70 (s, 4H). <sup>13</sup>C NMR (101 MHz, DMSO) δ 146.13, 145.11, 143.61, 142.38, 140.21, 135.11, 131.17, 130.73, 128.31, 127.95, 127.66, 127.09, 126.90, 117.43, 113.62, 112.29, 95.90, 28.68, 25.67. HRMS (ESI) m/z Calcd. for C<sub>19</sub>H<sub>14</sub>N<sub>3</sub>O<sub>3</sub><sup>+</sup> ([M+H]<sup>+</sup>) 332.1030, Found 332.1037.

## 4. -isocyano-2-nitro-1-(thiophen-3-yl)-9,10-dihydrophenanthren-3-amine (7oa)

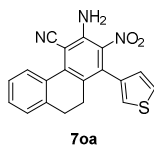

Prepared according to the general procedure as yellow solid (65 mg, 93% yield) after silica gel chromatography (petroleum ether/EtOAc = 10:1).  $^1\text{H}$  NMR (400 MHz,  $\text{CDCl}_3$ )  $\delta$  8.41–7.96 (m, 1H), 7.54–7.44 (m, 1H), 7.44–7.35 (m, 2H), 7.33–7.27 (m, 1H), 7.147.05 (m, 1H), 7.016.92 (m, 1H), 5.58 (s, 2H), 2.78–2.45 (m, 4H).  $^{13}\text{C}$  NMR (101 MHz,  $\text{CDCl}_3$ )  $\delta$  142.93, 142.32, 139.70, 136.24, 134.86, 132.88, 130.94, 130.56, 129.74, 128.13, 127.94, 127.67, 127.40, 127.12, 117.00, 96.12, 28.96, 26.03. HRMS (ESI)  $m/z$  Calcd. for  $\text{C}_{19}\text{H}_{14}\text{N}_3\text{O}_2\text{S}^+([\text{M}+\text{H}]^+)$  348.0801, Found 348.0805.

## 1. -(benzo[b]thiophen-3-yl)-4-isocyano-2-nitro-9,10-dihydrophenanthren-3-amine (7pa)

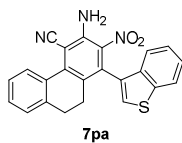

Prepared according to the general procedure as yellow solid (70 mg, 88% yield) after silica gel chromatography (petroleum ether/EtOAc = 10:1).  $^1\text{H}$  NMR (500 MHz,  $\text{CDCl}_3$ )  $\delta$  8.47 (s, 1H), 8.28 (dd,  $J$  = 7.6, 1.5 Hz, 1H), 7.48–7.38 (m, 3H), 7.34–7.28 (m, 2H), 7.20 (d,  $J$  = 2.6 Hz, 1H), 7.15 (ddd,  $J$  = 8.0, 7.1, 1.0 Hz, 1H), 5.46 (s, 2H), 2.68–2.57 (m, 3H), 2.512.41 (m, 1H).  $^{13}\text{C}$  NMR (101 MHz,  $\text{CDCl}_3$ )  $\delta$  143.57, 139.89, 130.92, 130.87, 130.62, 129.39, 128.00, 127.46, 127.16, 125.01, 124.83, 124.47, 124.44, 122.96, 122.30, 117.11, 28.97, 25.67. HRMS (ESI)  $m/z$  Calcd. for  $\text{C}_{23}\text{H}_{16}\text{N}_3\text{O}_2\text{S}^+([\text{M}+\text{H}]^+)$  398.0958, Found 398.0963.

## 1. -(1H-indol-3-yl)-4-isocyano-2-nitro-9,10-dihydrophenanthren-3-amine (7qa)

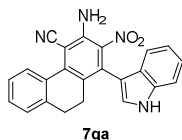

Prepared according to the general procedure as yellow solid (36 mg, 27% yield) after silica gel chromatography (petroleum ether/EtOAc = 10:1).  $^1\text{H}$  NMR (500 MHz,  $\text{CDCl}_3$ )  $\delta$  8.47 (s, 1H), 8.28 (dd,  $J$  = 7.6, 1.5 Hz, 1H), 7.48–7.38 (m, 3H), 7.34–7.28 (m, 2H), 7.277.25 (m, 1H), 7.20 (d,  $J$  = 2.6 Hz, 1H), 7.15 (ddd,  $J$  = 8.0, 7.1, 1.0 Hz, 1H), 5.46 (s, 2H), 2.68–2.57 (m, 3H), 2.51–2.43 (m, 1H).  $^{13}\text{C}$  NMR (101 MHz,  $\text{CDCl}_3$ )  $\delta$  142.69, 141.74, 139.85, 135.79, 133.24, 131.40, 130.23, 129.96, 127.86, 127.34, 127.03, 126.63, 123.23, 122.99, 120.75, 119.43, 117.43, 111.65, 110.72, 94.88, 29.16, 26.03. HRMS (ESI)  $m/z$  Calcd. for  $\text{C}_{23}\text{H}_{17}\text{N}_4\text{O}_2^+([\text{M}+\text{H}]^+)$  381.1346, Found 381.1352.

## 4. -isocyano-7-methoxy-2-nitro-1-phenyl-9,10-dihydrophenanthren-3-amine (7ab)

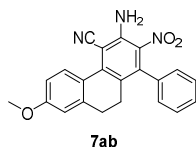

Prepared according to the general procedure as yellow solid (58 mg, 80% yield) after silica gel chromatography (petroleum ether/EtOAc = 10:1).  $^1\text{H}$  NMR (500 MHz,  $\text{CDCl}_3$ )  $\delta$  8.22 (d,  $J$  = 8.8 Hz, 1H), 7.50–7.39 (m, 3H), 7.24–7.18 (m, 2H), 6.96 (dd,  $J$  = 8.7, 2.7 Hz, 1H), 6.81 (d,  $J$  = 2.7 Hz, 1H), 5.73 (s, 2H), 3.88 (s, 3H), 2.71–2.55 (m, 2H), 2.46–2.30 (m, 2H).  $^{13}\text{C}$  NMR (101 MHz,  $\text{CDCl}_3$ )  $\delta$  161.28, 143.49, 142.78, 141.98, 140.32, 135.94, 134.68, 129.13, 128.72, 128.40, 127.96, 127.29, 123.87, 117.49, 113.64, 112.04, 94.48, 55.42, 29.43, 25.89. HRMS (ESI)  $m/z$  Calcd. for  $\text{C}_{22}\text{H}_{18}\text{N}_3\text{O}_3^+([\text{M}+\text{H}]^+)$  372.1343, Found 372.1347.

7. -chloro-4-isocyano-2-nitro-1-phenyl-9,10-dihydrophenanthren-3-amine (7ac)

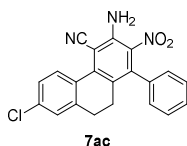

Prepared according to the general procedure as yellow solid (66 mg, 89% yield) after silica gel chromatography (petroleum ether/EtOAc = 10:1).  $^1\text{H}$  NMR (400 MHz,  $\text{CDCl}_3$ )  $\delta$  8.17 (d,  $J$  = 8.5 Hz, 1H), 7.52–7.41 (m, 3H), 7.39 (dd,  $J$  = 8.5, 2.3 Hz, 1H), 7.28 (d,  $J$  = 2.2 Hz, 1H), 7.24–7.11 (m, 2H), 5.64 (s, 2H), 2.61 (dd,  $J$  = 8.4, 5.3 Hz, 2H), 2.43–2.30 (m, 2H).  $^{13}\text{C}$  NMR (101 MHz,  $\text{CDCl}_3$ )  $\delta$  143.26, 141.60, 141.37, 140.47, 136.29, 135.69, 135.39, 129.59, 128.83, 128.67, 128.64, 128.02, 127.94, 127.81, 127.24, 116.98, 95.16, 28.92, 25.73. HRMS (ESI)  $m/z$  Calcd. for  $\text{C}_{21}\text{H}_{15}\text{ClN}_3\text{O}_2^+([\text{M}+\text{H}]^+)$  376.0847, Found 376.0855.

4. -isocyano-6-methoxy-2-nitro-1-phenyl-9,10-dihydrophenanthren-3-amine (7ad)

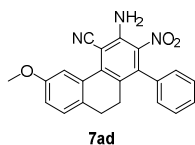

Prepared according to the general procedure as yellow solid (66 mg, 89% yield) after silica gel chromatography (petroleum ether/EtOAc = 10:1).  $^1\text{H}$  NMR (500 MHz,  $\text{CDCl}_3$ )  $\delta$  7.82 (d,  $J$  = 2.5 Hz, 1H), 7.49–7.40 (m, 3H), 7.25–7.17 (m, 3H), 6.97 (dd,  $J$  = 8.3, 2.6 Hz, 1H), 5.67 (s, 2H), 3.93 (s, 3H), 2.65–2.51 (m, 2H), 2.47–2.30 (m, 2H).  $^{13}\text{C}$  NMR (101 MHz,  $\text{CDCl}_3$ )  $\delta$  158.43, 143.20, 142.52, 140.32, 135.64, 131.84, 131.77, 128.76, 128.54, 128.32, 127.99, 117.23, 117.01, 112.20, 95.30, 55.64, 28.05, 26.28. HRMS (ESI)  $m/z$  Calcd. for  $\text{C}_{22}\text{H}_{18}\text{N}_3\text{O}_3^+([\text{M}+\text{H}]^+)$  372.1343, Found 372.1347.

4. -isocyano-6-methyl-2-nitro-1-phenyl-9,10-dihydrophenanthren-3-amine (7ae)

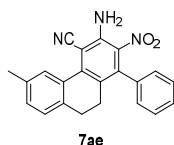

Prepared according to the general procedure as yellow solid (64 mg, 95% yield) after silica gel chromatography (petroleum ether/EtOAc = 10:1).  $^1\text{H}$  NMR (500 MHz,  $\text{CDCl}_3$ )  $\delta$  8.14–8.02 (m, 1H), 7.50–7.41 (m, 3H), 7.26–7.16 (m, 4H), 5.70 (s, 2H), 2.65–2.57 (m, 2H), 2.48 (s, 3H), 2.42–2.35 (m, 2H).  $^{13}\text{C}$  NMR (101 MHz,  $\text{CDCl}_3$ )  $\delta$  143.32, 142.73, 140.32, 136.81, 136.74, 135.77, 135.43, 131.23, 131.00, 128.80, 128.55, 128.25, 128.03, 127.80, 117.26, 95.30, 28.60, 26.23, 21.35. HRMS (ESI)  $m/z$  Calcd. for  $\text{C}_{22}\text{H}_{18}\text{N}_3\text{O}_2^+([\text{M}+\text{H}]^+)$  356.1394, Found 356.1398.



## 10. -isocyano-8-nitro-7-phenyl-6H-benzo[c]chromen-9-amine (7af)

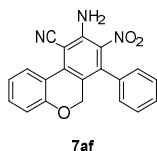

Prepared according to the general procedure as yellow solid (59 mg, 86% yield) after silica gel chromatography (petroleum ether/EtOAc = 10:1).  $^1\text{H}$  NMR (500 MHz,  $\text{CDCl}_3$ )  $\delta$  8.41 (dd,  $J$  = 8.0, 1.5 Hz, 1H), 7.55–7.37 (m, 4H), 7.24–7.13 (m, 3H), 7.05 (dd,  $J$  = 8.2, 1.2 Hz, 1H), 5.86 (s, 2H), 4.63 (s, 2H).  $^{13}\text{C}$  NMR (101 MHz,  $\text{CDCl}_3$ )  $\delta$  156.71, 144.61, 139.03, 137.50, 134.76, 134.01, 132.87, 129.09, 129.00, 127.64, 126.58, 122.66, 122.58, 120.32, 117.85, 116.65, 93.71, 65.59. HRMS (ESI)  $m/z$  Calcd. for  $\text{C}_{20}\text{H}_{14}\text{N}_3\text{O}_3^+([\text{M}+\text{H}]^+)$  344.1030, Found 344.1038.

## 10. -isocyano-8-nitro-6,7-diphenyl-6H-benzo[c]chromen-9-amine (7ag)

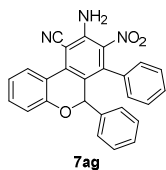

Prepared according to the general procedure as yellow solid (57 mg, 68% yield) after silica gel chromatography (petroleum ether/EtOAc = 10:1).  $^1\text{H}$  NMR (500 MHz,  $\text{CDCl}_3$ )  $\delta$  8.42 (dd,  $J$  = 8.0, 1.5 Hz, 1H), 7.44 (tdd,  $J$  = 7.7, 1.5, 0.6 Hz, 1H), 7.36 (tt,  $J$  = 7.5, 1.3 Hz, 1H), 7.23–7.10 (m, 4H), 7.07 (ddd,  $J$  = 8.1, 7.4, 1.2 Hz, 1H), 7.04–6.96 (m, 2H), 6.86 (dd,  $J$  = 8.1, 1.2 Hz, 1H), 6.80–6.73 (m, 1H), 5.88 (s, 2H), 5.83 (s, 1H).  $^{13}\text{C}$  NMR (101 MHz,  $\text{CDCl}_3$ )  $\delta$  153.91, 144.80, 137.87, 133.59, 132.97, 128.94, 128.80, 128.61, 128.55, 128.20, 127.13, 126.03, 123.45, 122.40, 119.08, 116.76, 75.18. HRMS (ESI)  $m/z$  Calcd. for  $\text{C}_{26}\text{H}_{18}\text{N}_3\text{O}_3^+([\text{M}+\text{H}]^+)$  420.1343, Found 420.1350.

## 2. -amino-3-nitro-4-phenyl-6,7-dihydro-5H-dibenzo[a,c][7]annulene-1-carbonitrile (7ah)

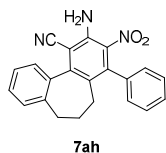

Prepared according to the general procedure as yellow solid (70 mg, 97% yield) after silica gel chromatography (petroleum ether/EtOAc = 10:1).  $^1\text{H}$  NMR (500 MHz,  $\text{CDCl}_3$ )  $\delta$  7.67–7.61 (m, 1H), 7.51–7.39 (m, 5H), 7.35–7.31 (m, 1H), 7.31–7.28 (m, 1H), 7.21–7.15 (m, 1H), 5.51 (s, 2H), 2.72–2.60 (m, 1H), 2.56–2.43 (m, 1H), 2.29–2.17 (m, 1H), 1.96–1.83 (m, 3H).  $^{13}\text{C}$  NMR (101 MHz,  $\text{CDCl}_3$ )  $\delta$  148.56, 142.09, 140.52, 139.94, 136.23, 135.67, 135.62, 130.15, 129.19, 128.97, 128.65, 128.58, 128.42, 128.32, 128.29, 127.94, 126.69, 116.11, 98.51, 32.59, 30.79, 26.84. HRMS (ESI)  $m/z$  Calcd. for  $\text{C}_{22}\text{H}_{18}\text{N}_3\text{O}_2^+([\text{M}+\text{H}]^+)$  356.1394, Found 356.1400.

## 4. -isocyano-2-nitro-1-phenyl-9H-fluoren-3-amine (7ai)

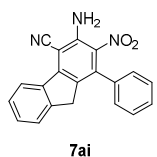

Prepared according to the general procedure as yellow solid (8 mg, 13% yield) after silica gel chromatography (petroleum ether/EtOAc = 10:1).  $^1\text{H}$  NMR (400 MHz, DMSO)  $\delta$  8.27 (dd,  $J$  = 7.1, 1.7 Hz, 1H), 7.55 (d,  $J$  = 7.5 Hz, 1H), 7.50–7.39 (m, 5H), 7.36–7.30 (m, 2H), 6.63 (s, 2H), 2.45 (p,  $J$  = 1.8 Hz, 12H).  $^{13}\text{C}$  NMR (101 MHz, DMSO)  $\delta$  146.76, 145.52, 144.54, 138.00, 137.77, 135.56, 135.51, 131.24, 130.09, 129.26, 129.11, 128.05, 127.92, 126.06, 122.33, 116.17, 89.58, 36.12. HRMS (ESI)  $m/z$  Calcd. for  $\text{C}_{20}\text{H}_{14}\text{N}_3\text{O}_2^+([\text{M}+\text{H}]^+)$  328.1081, Found 328.1090.

### 3. NMR spectra for compounds

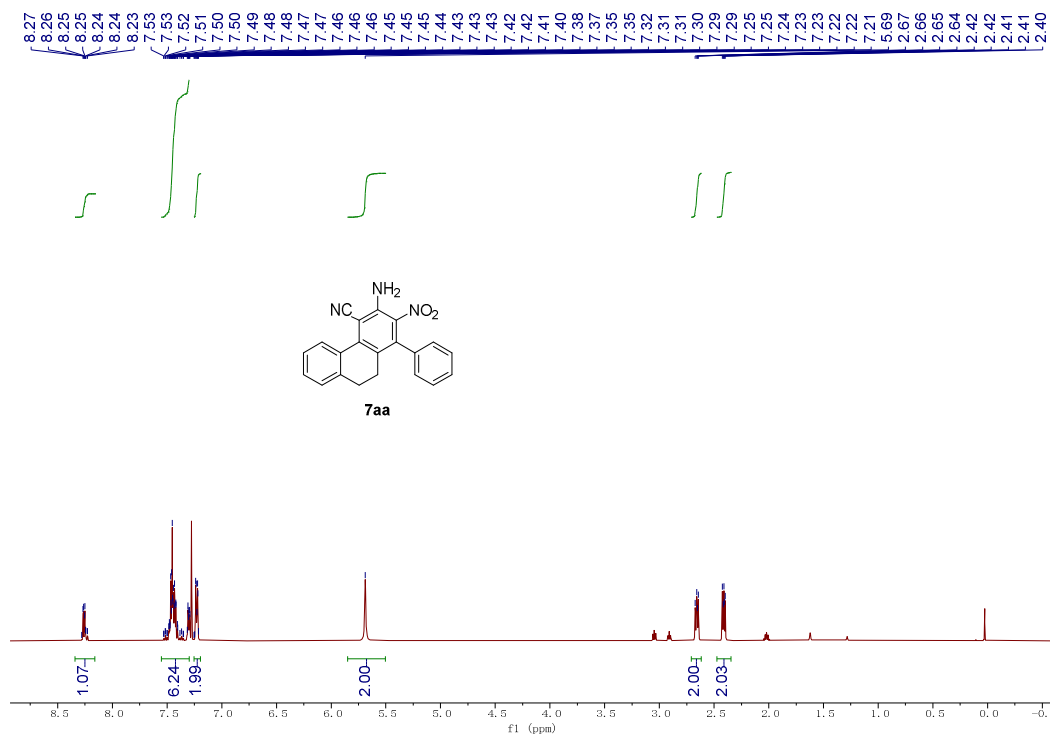

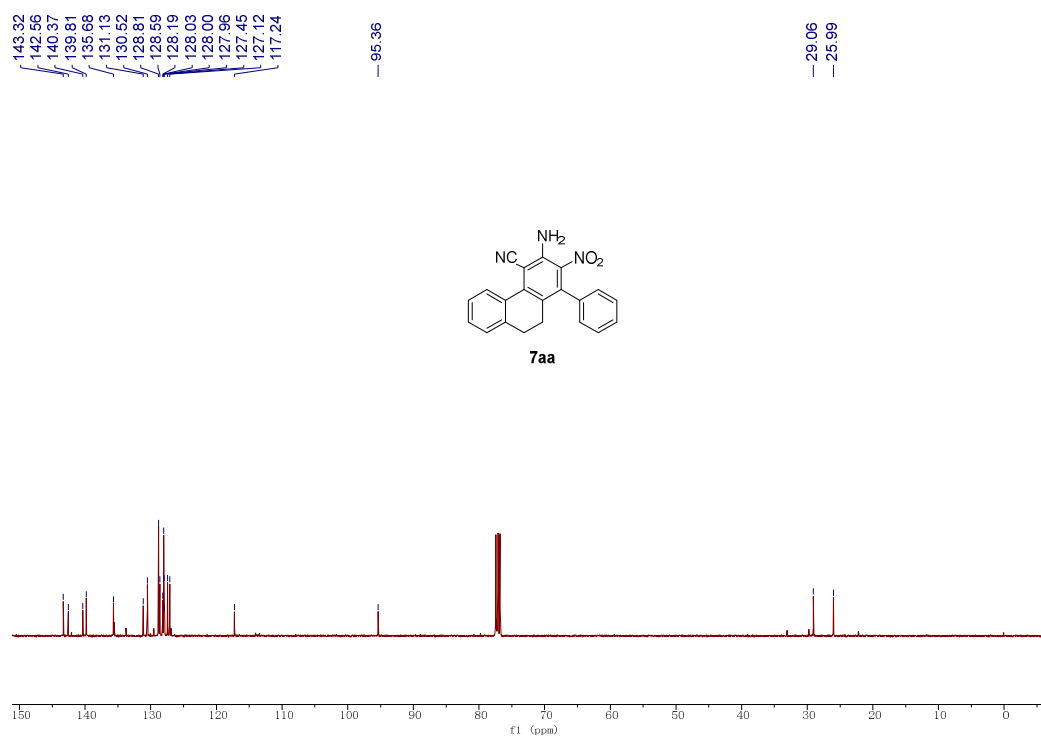

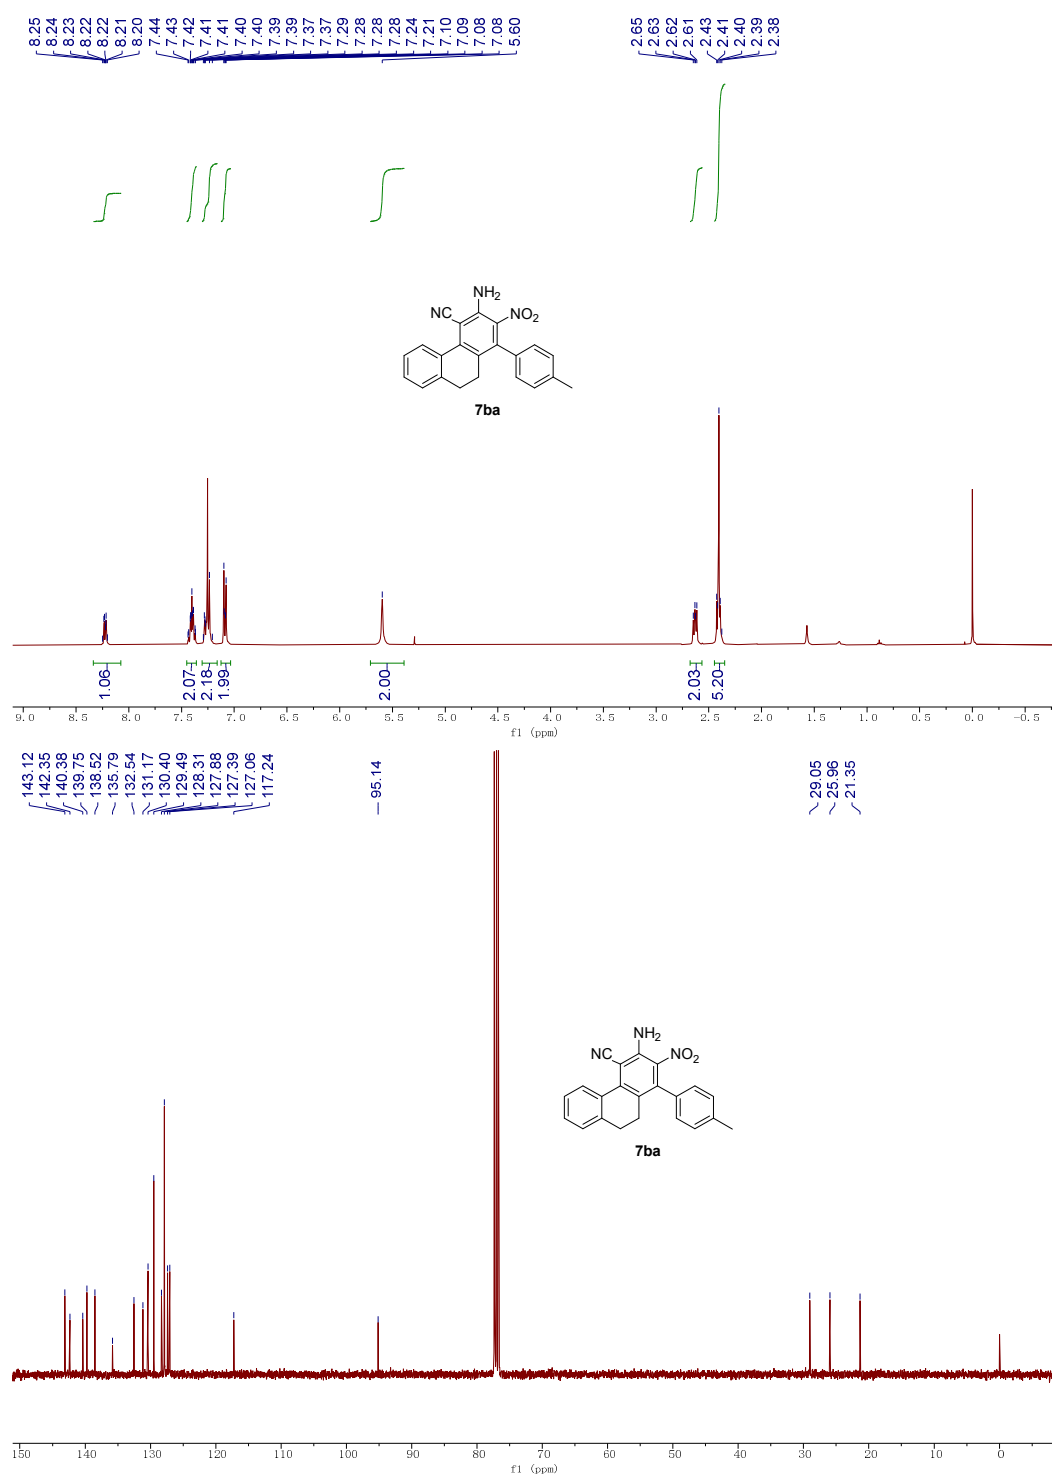

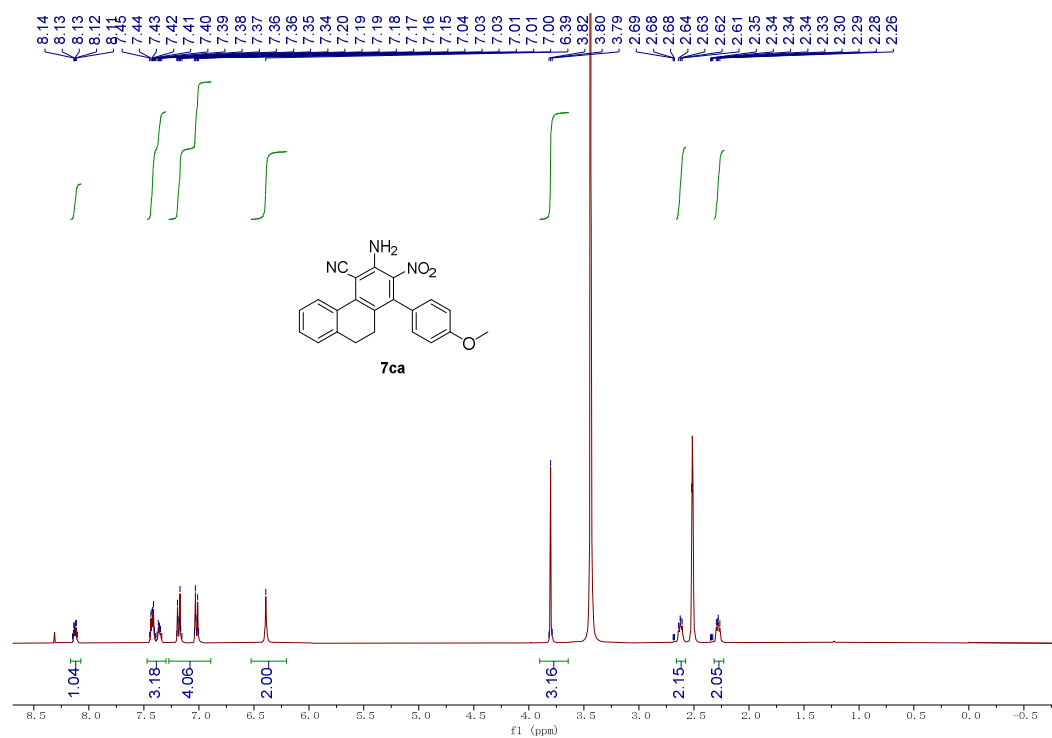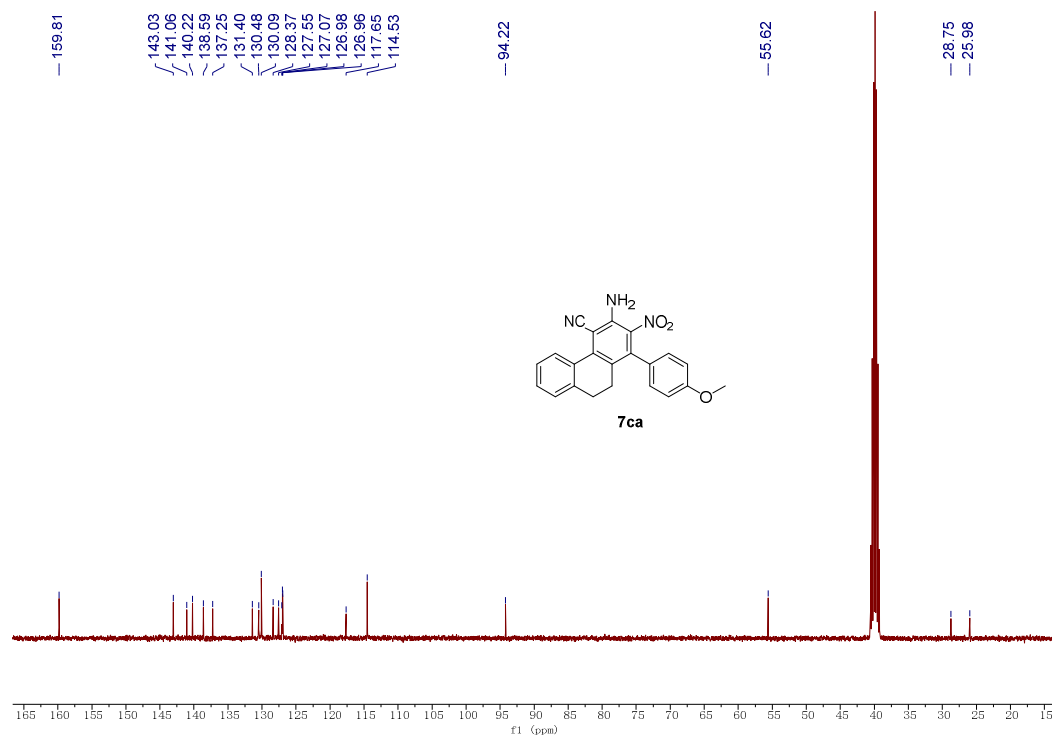

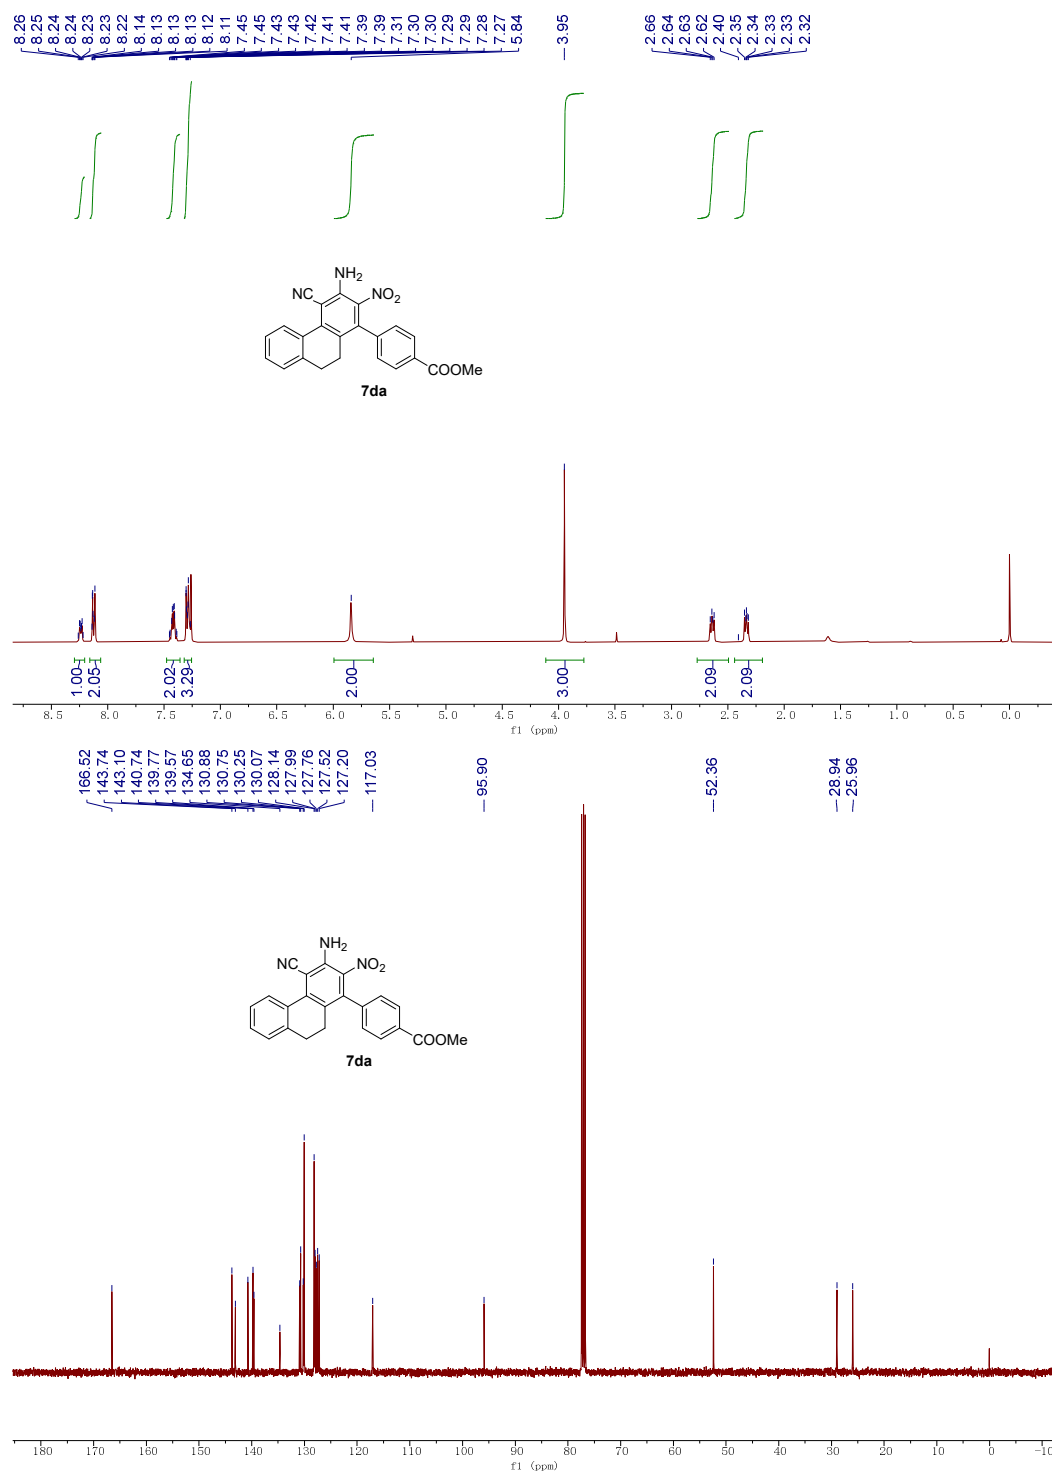

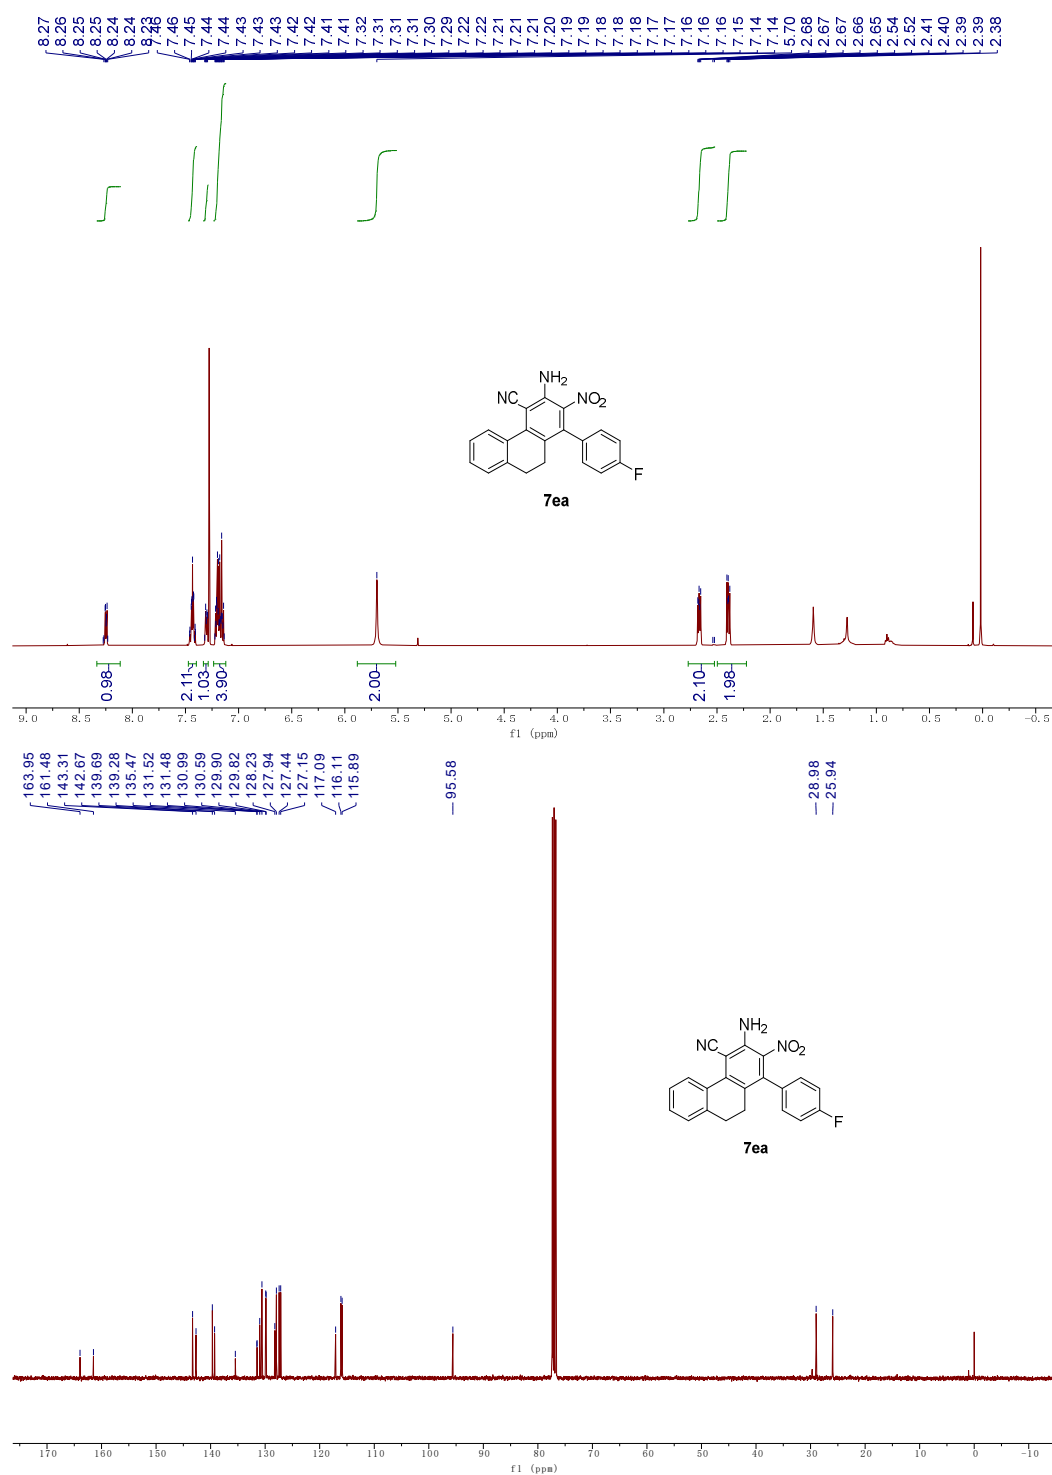

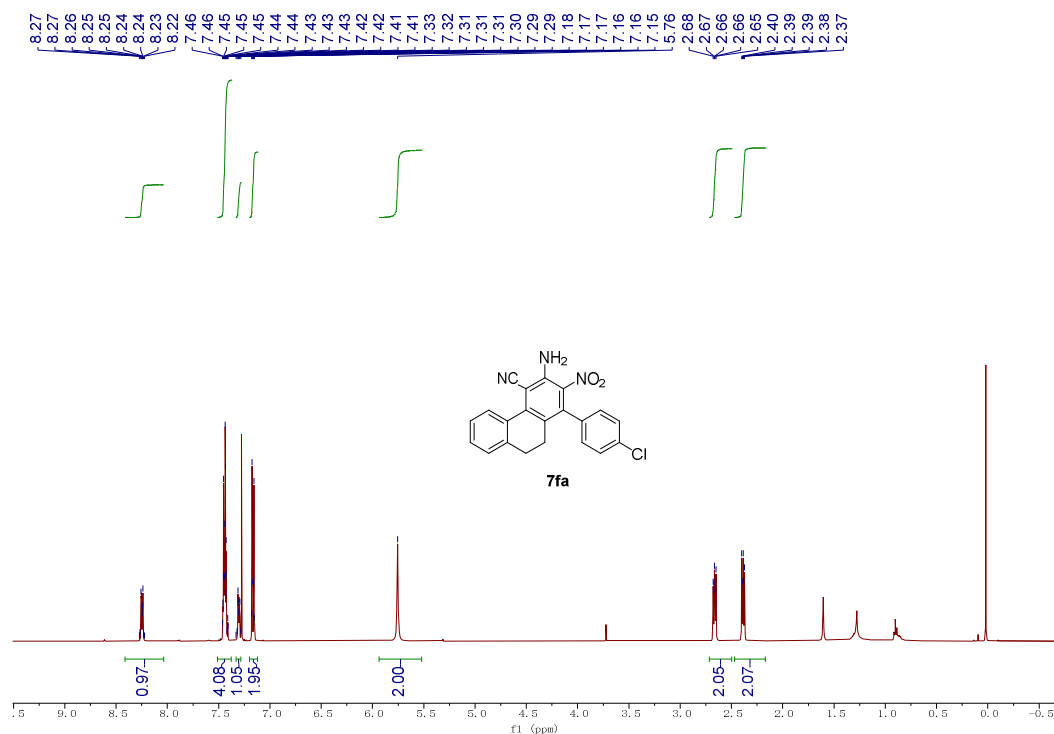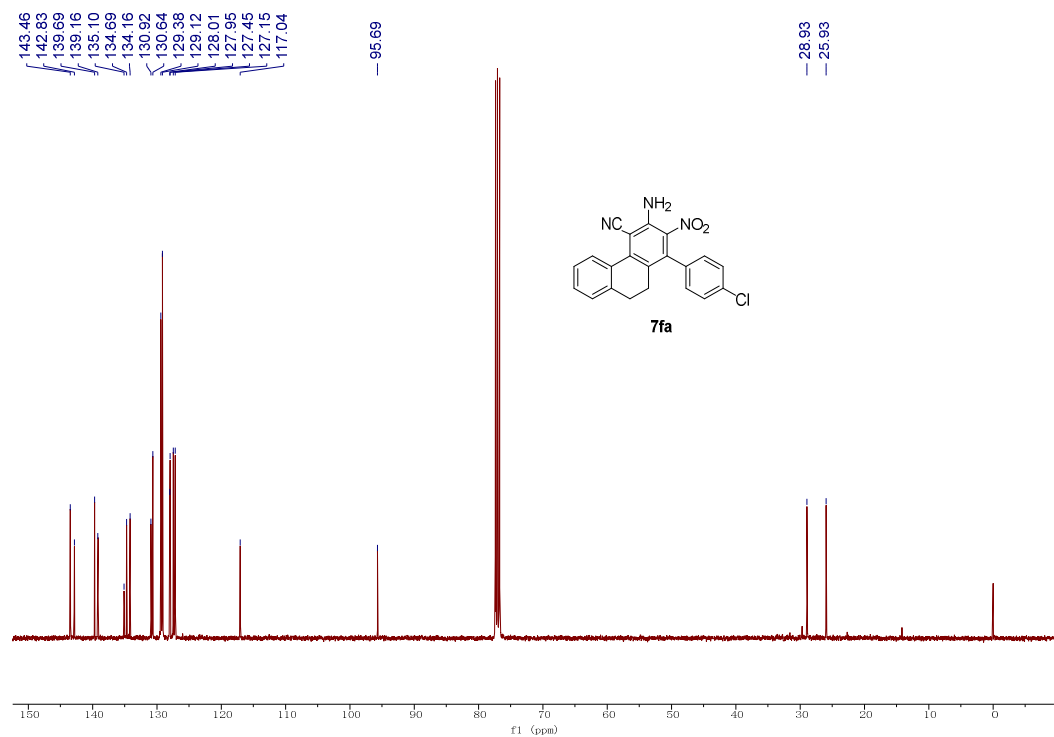



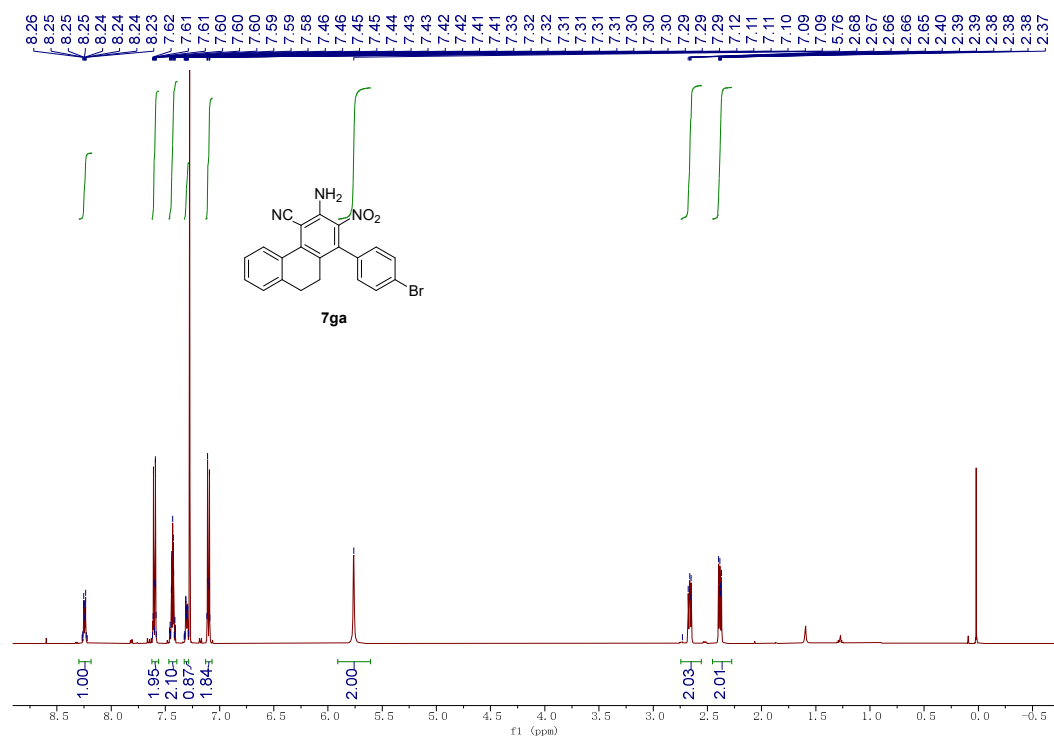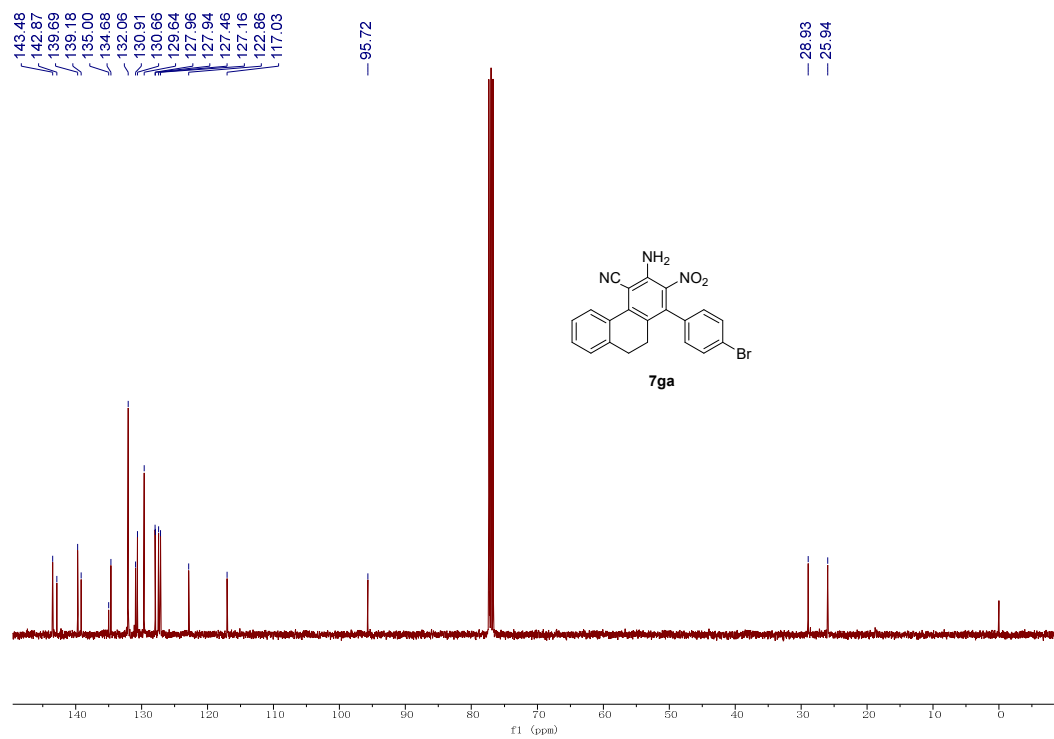

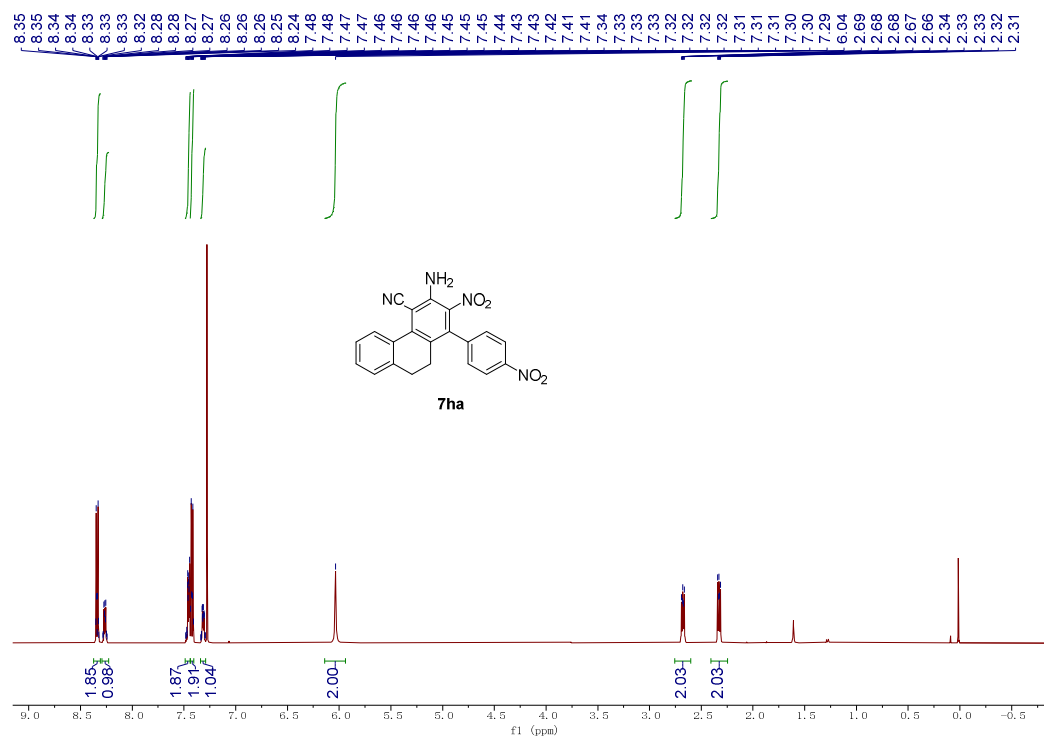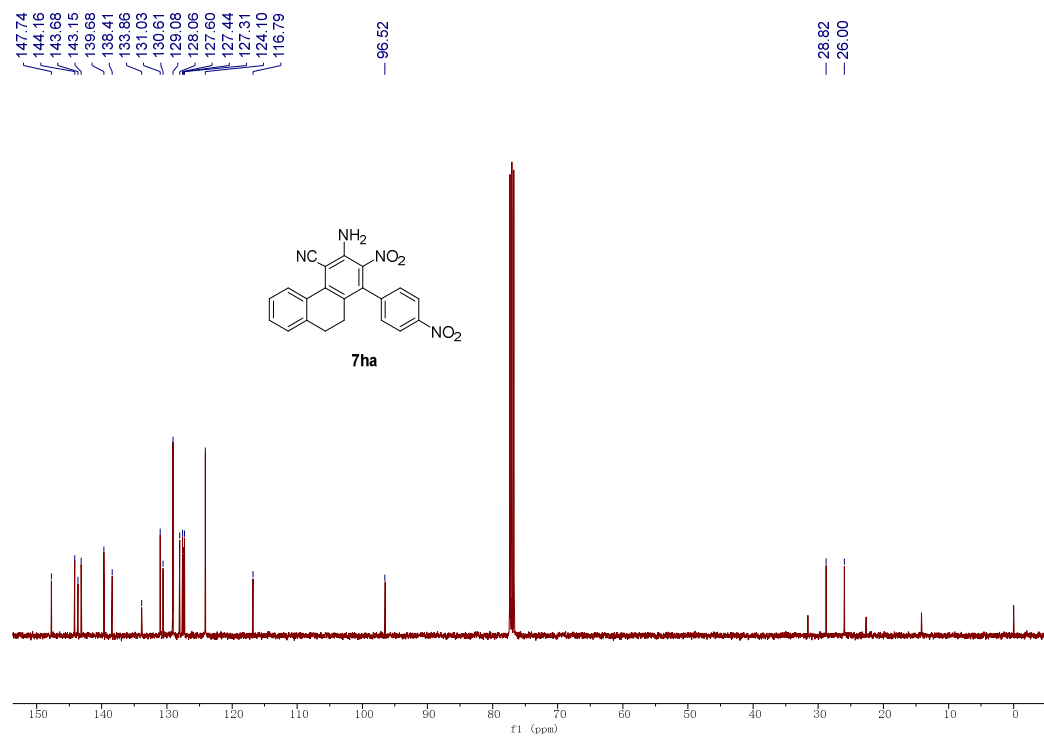

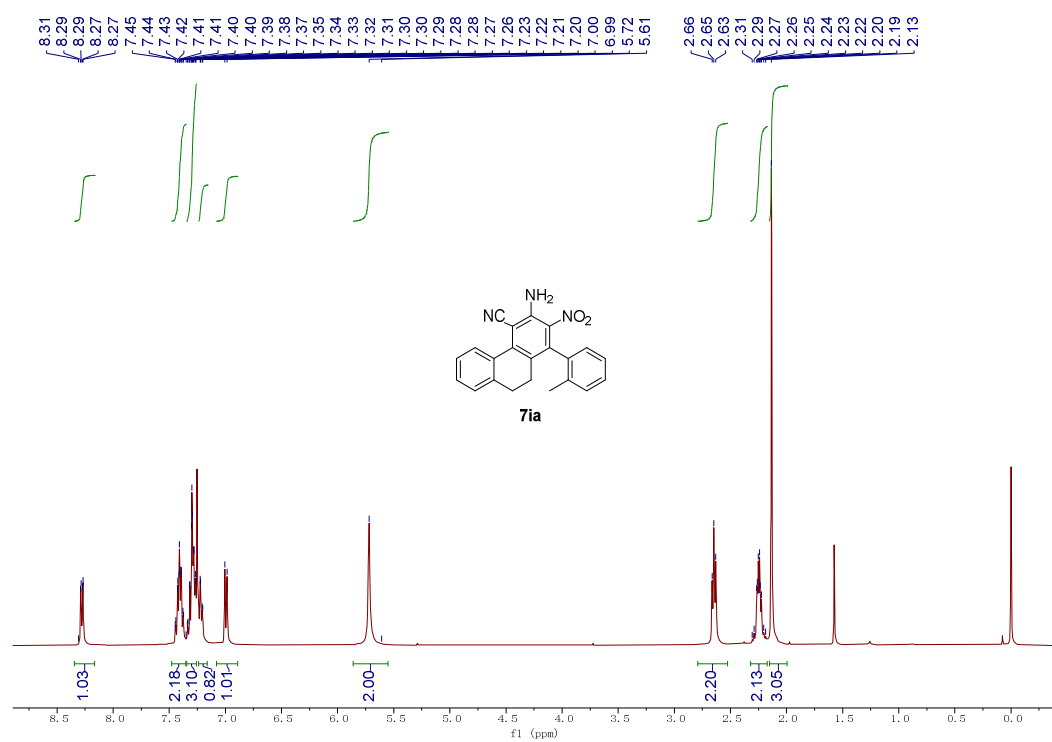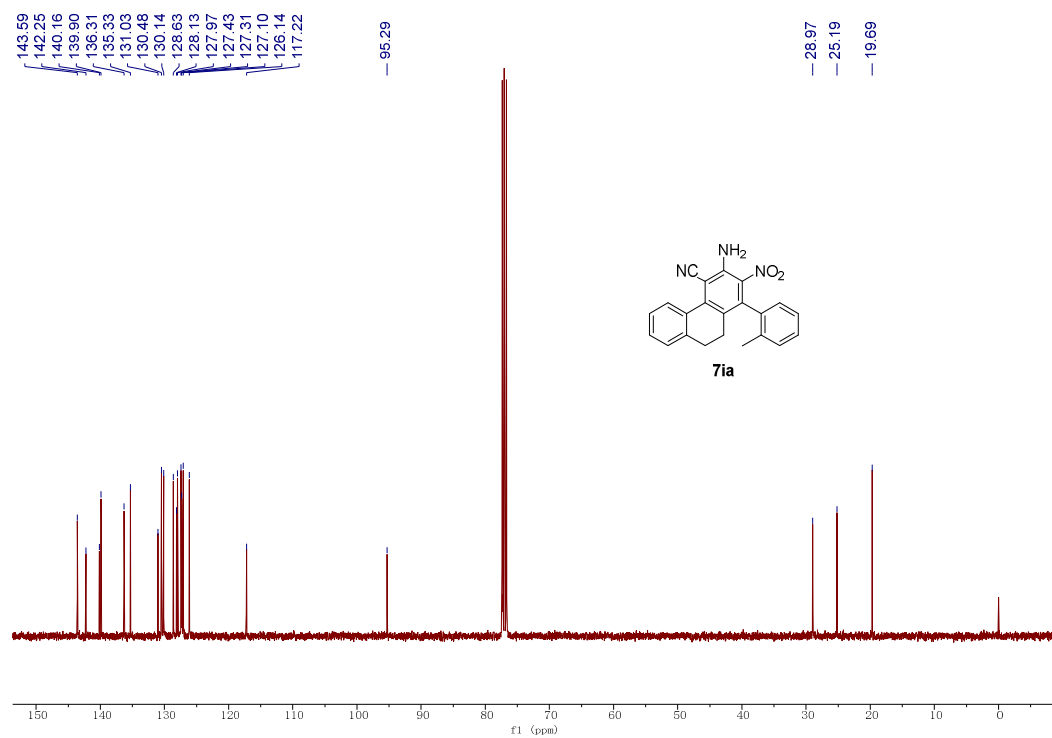

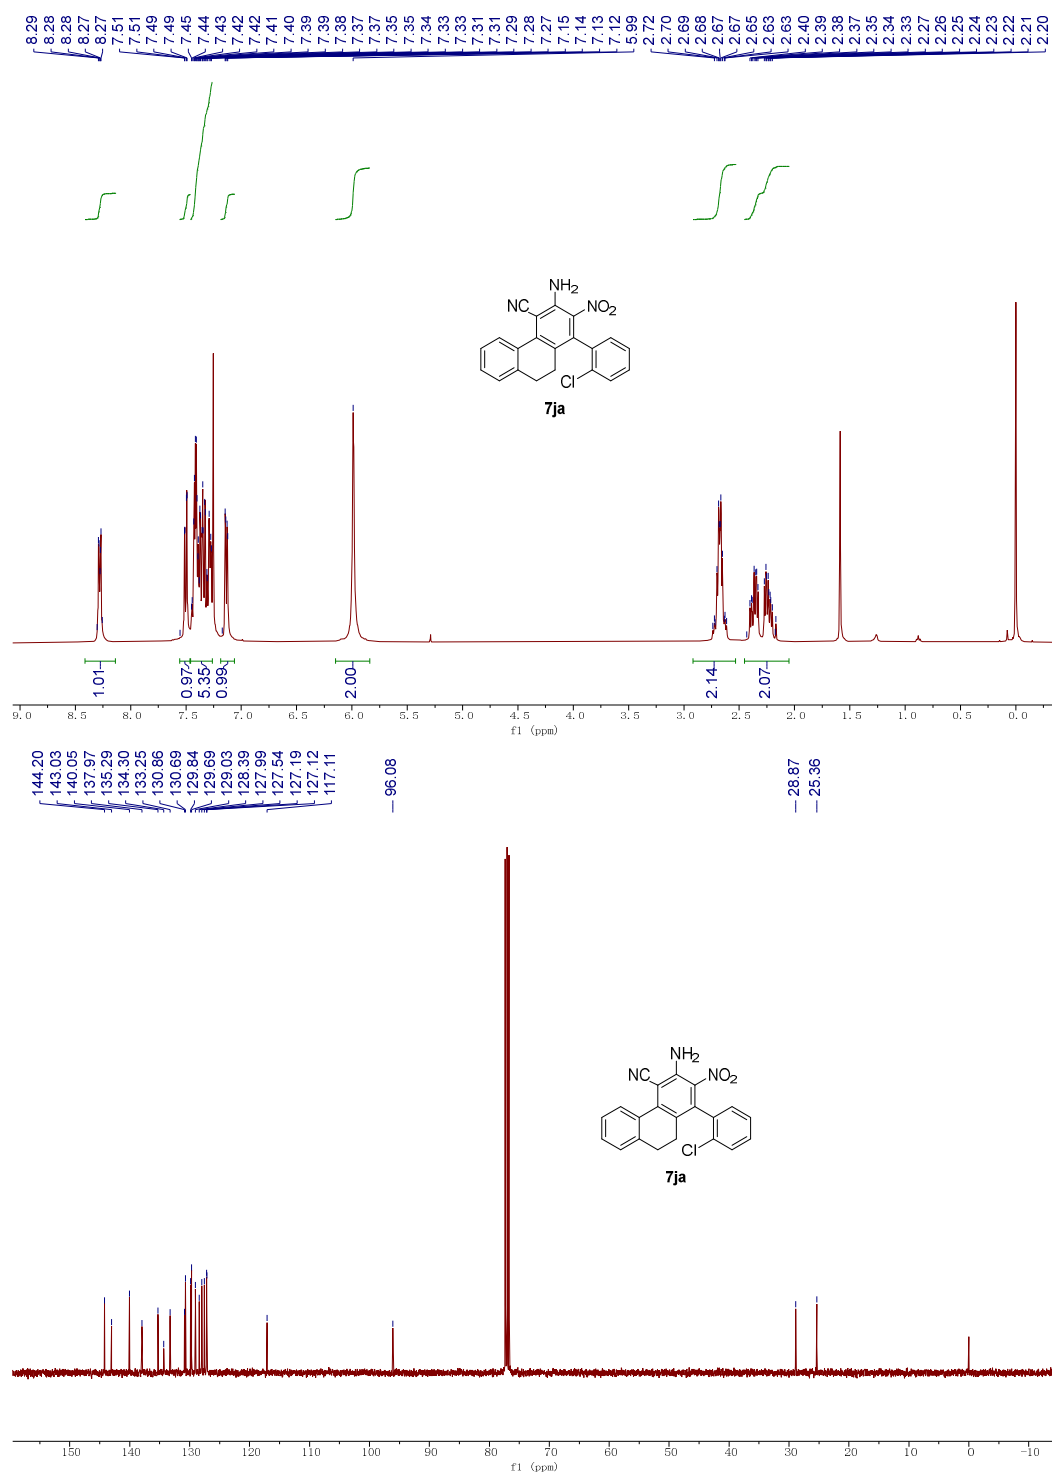

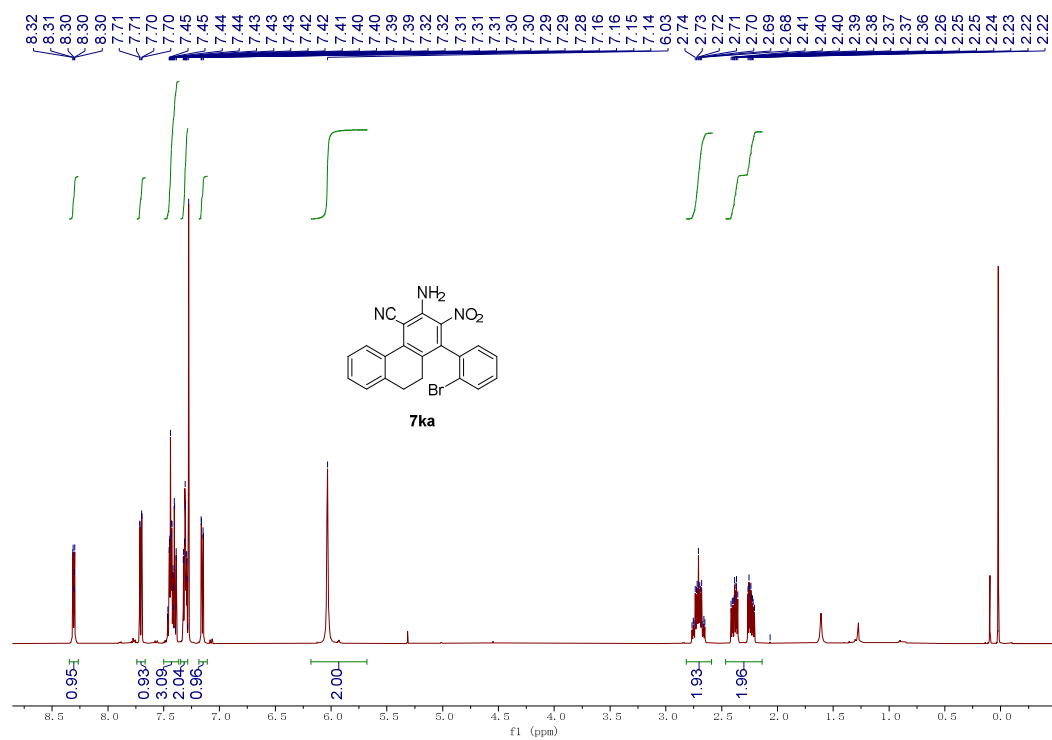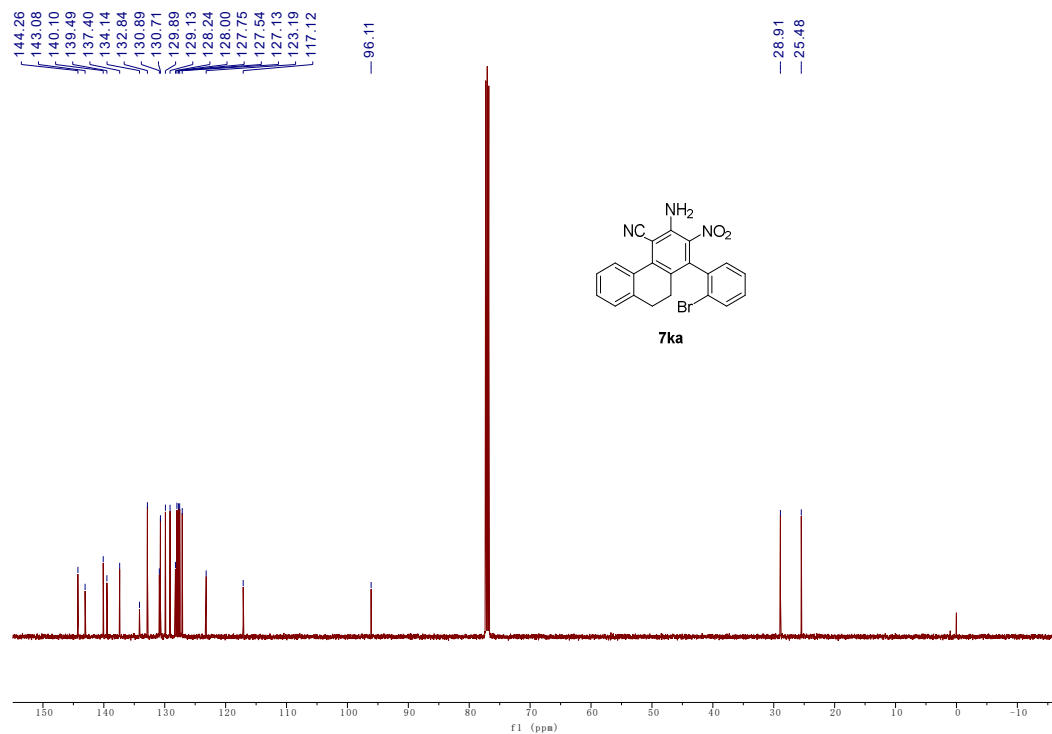

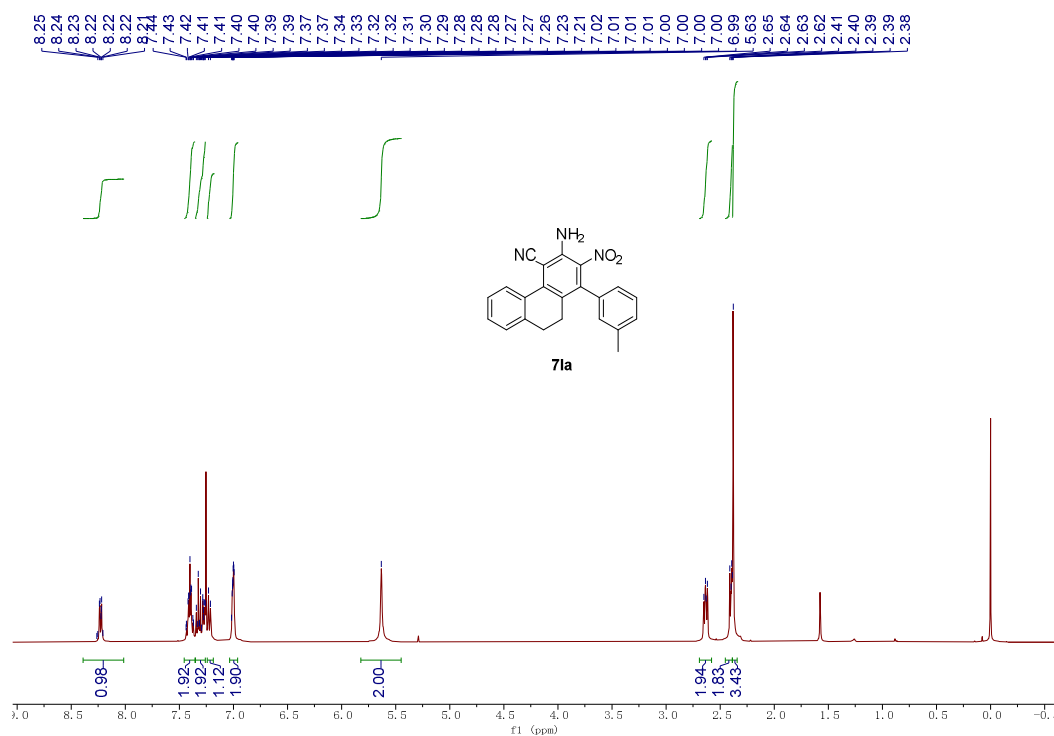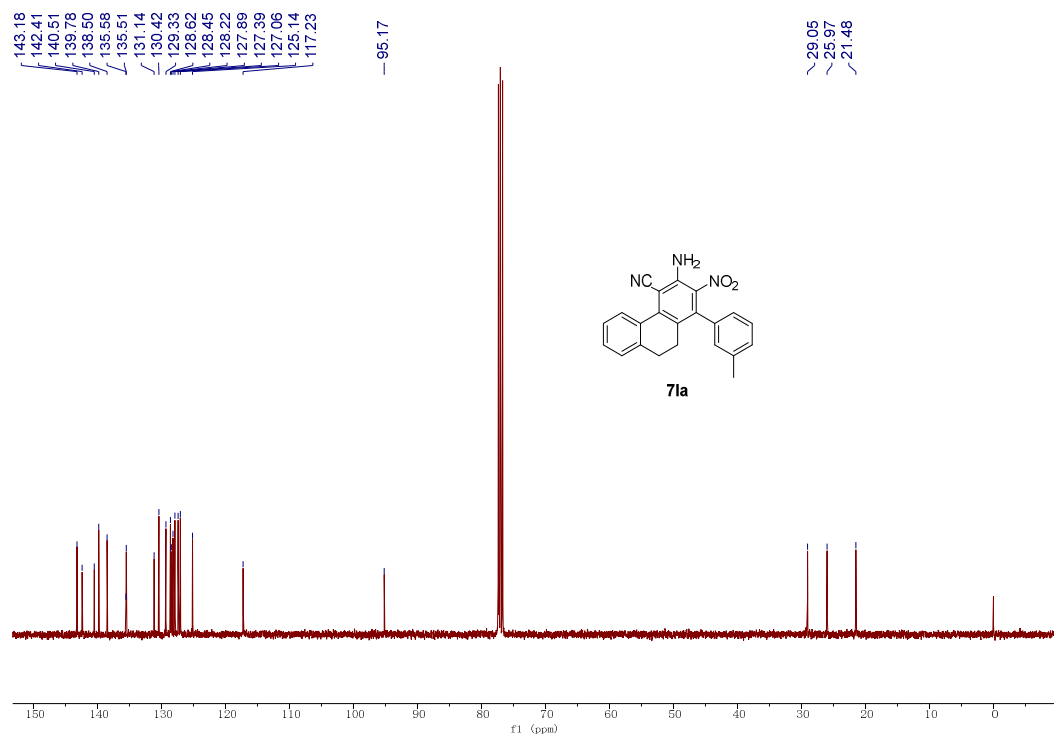

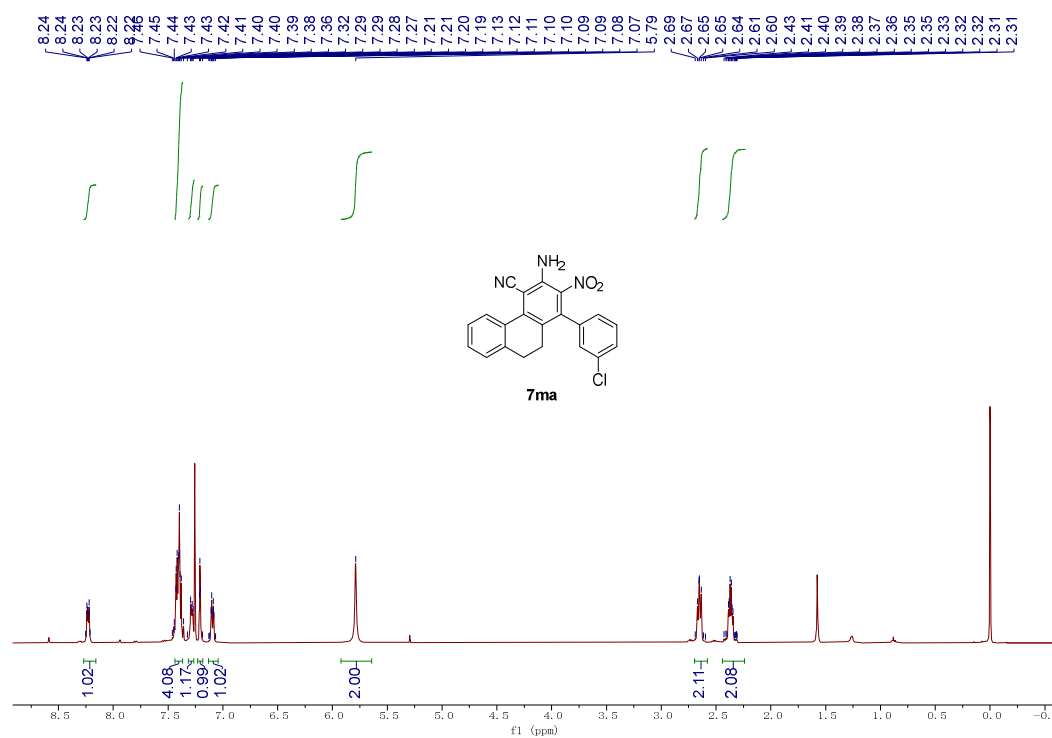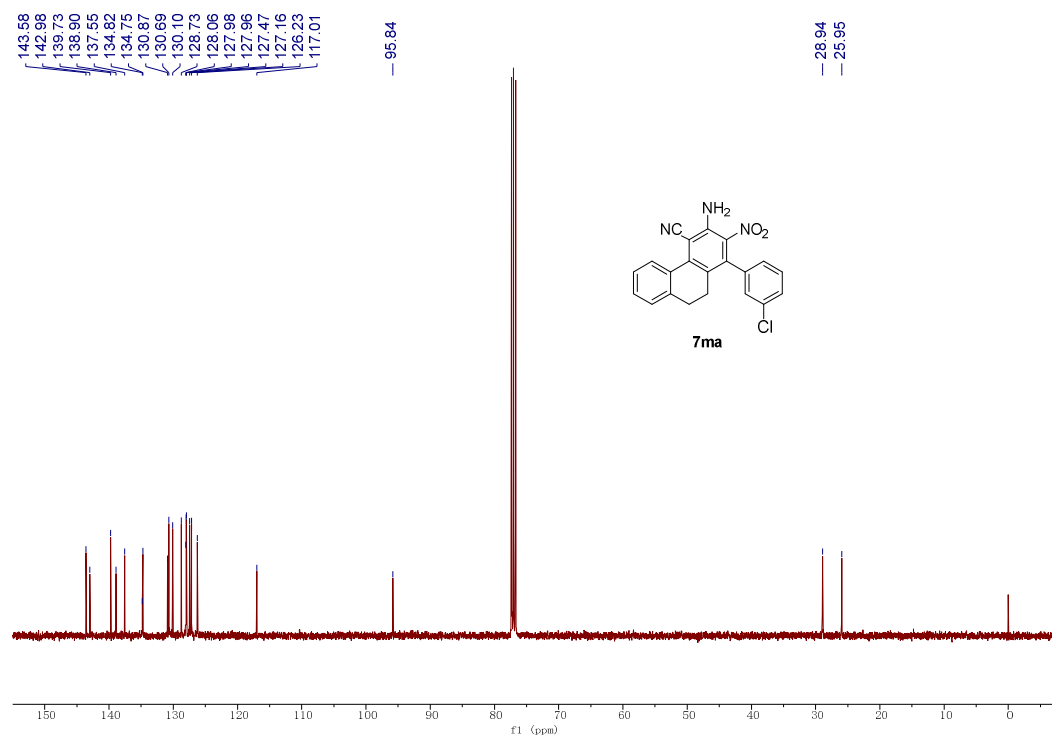

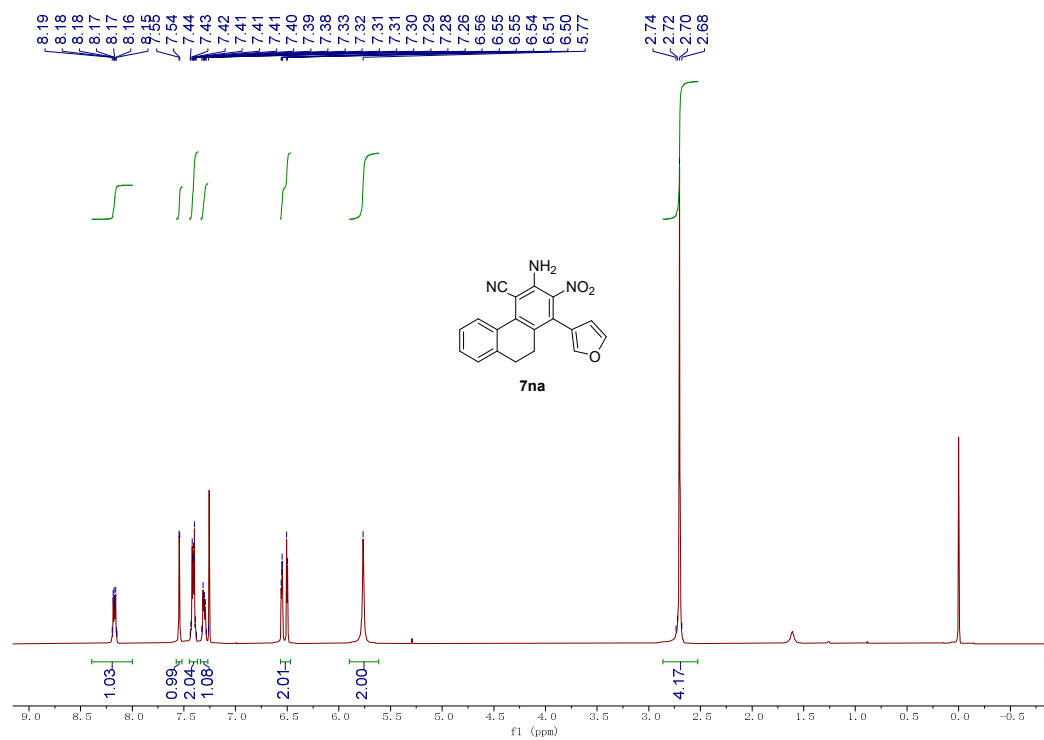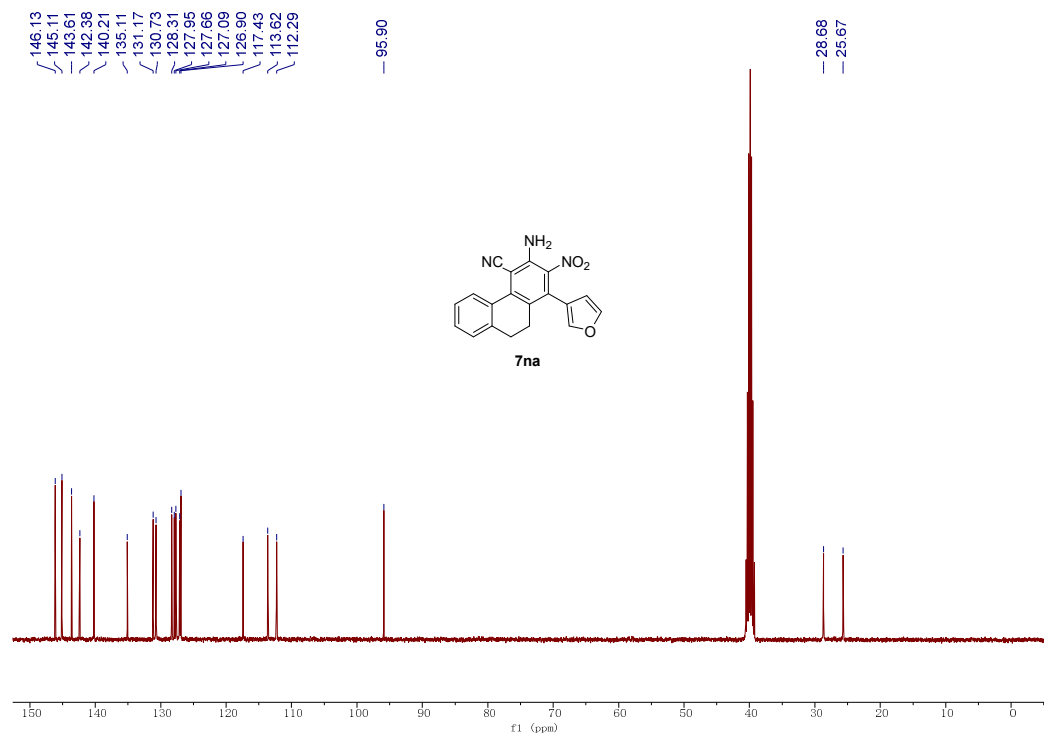



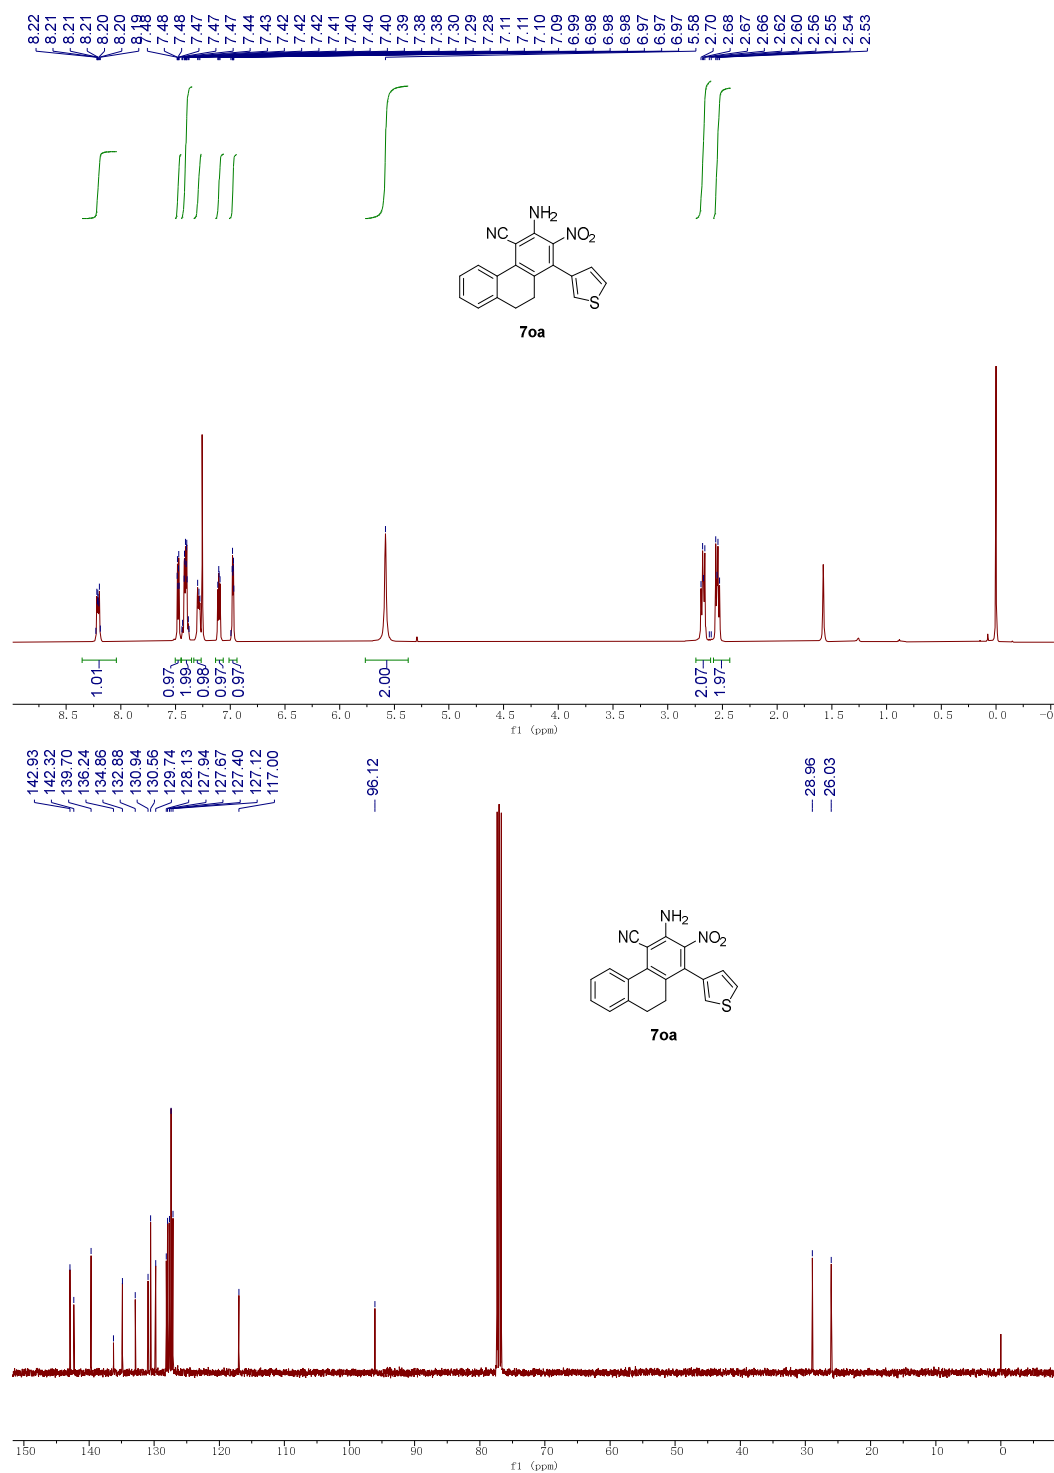

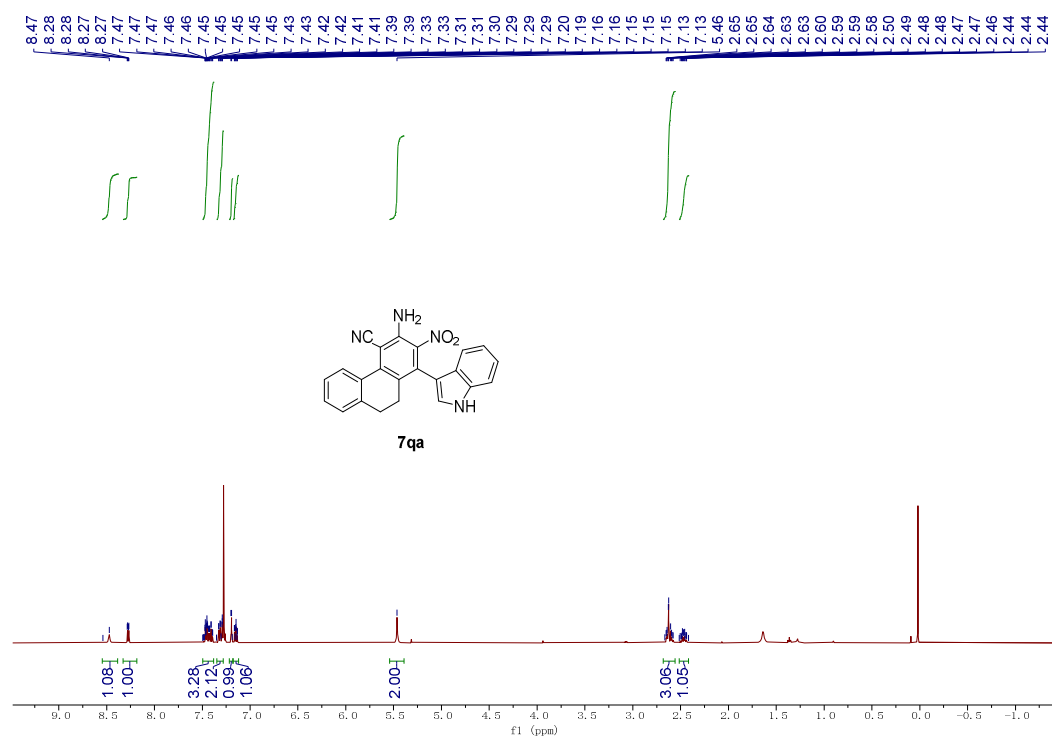

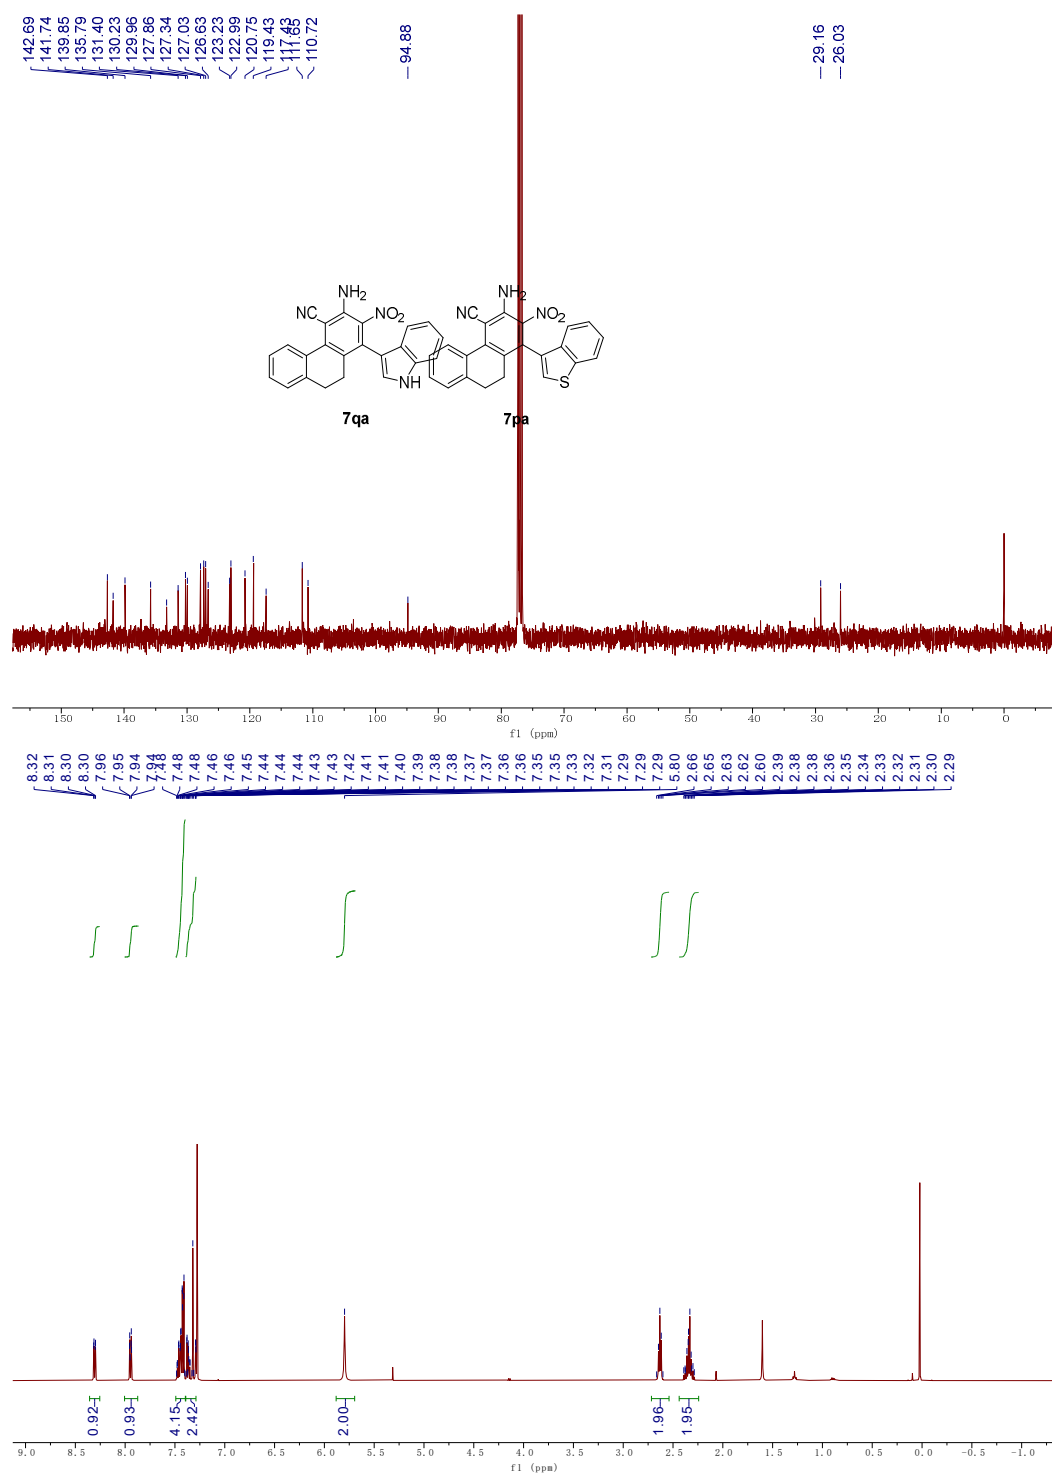

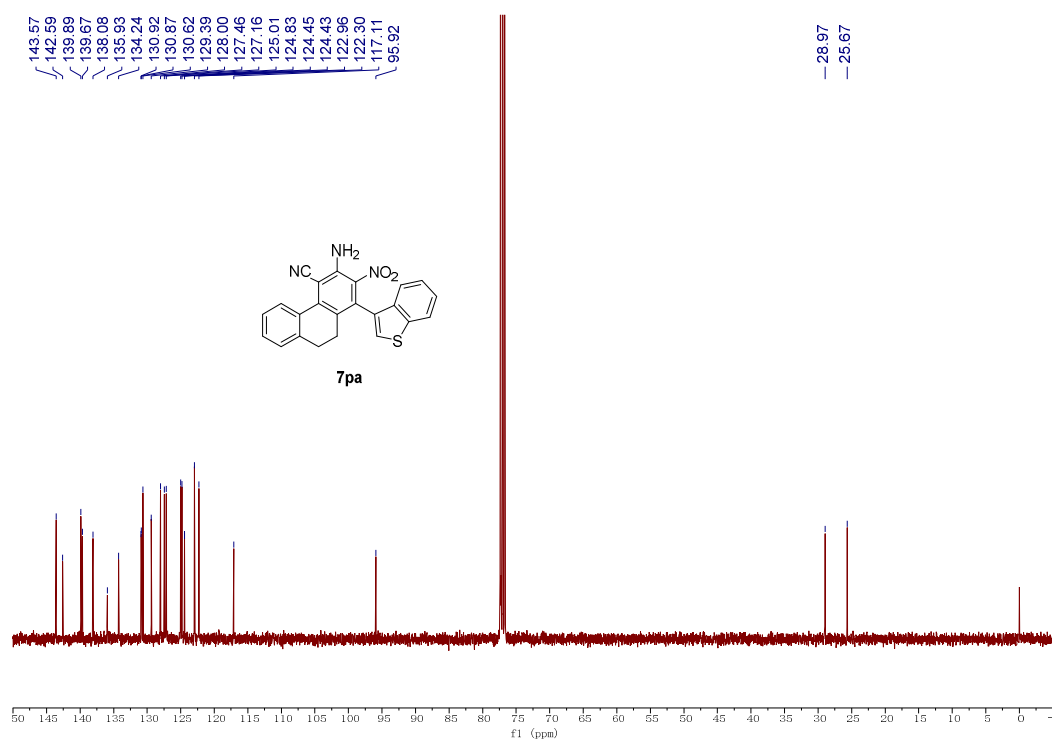

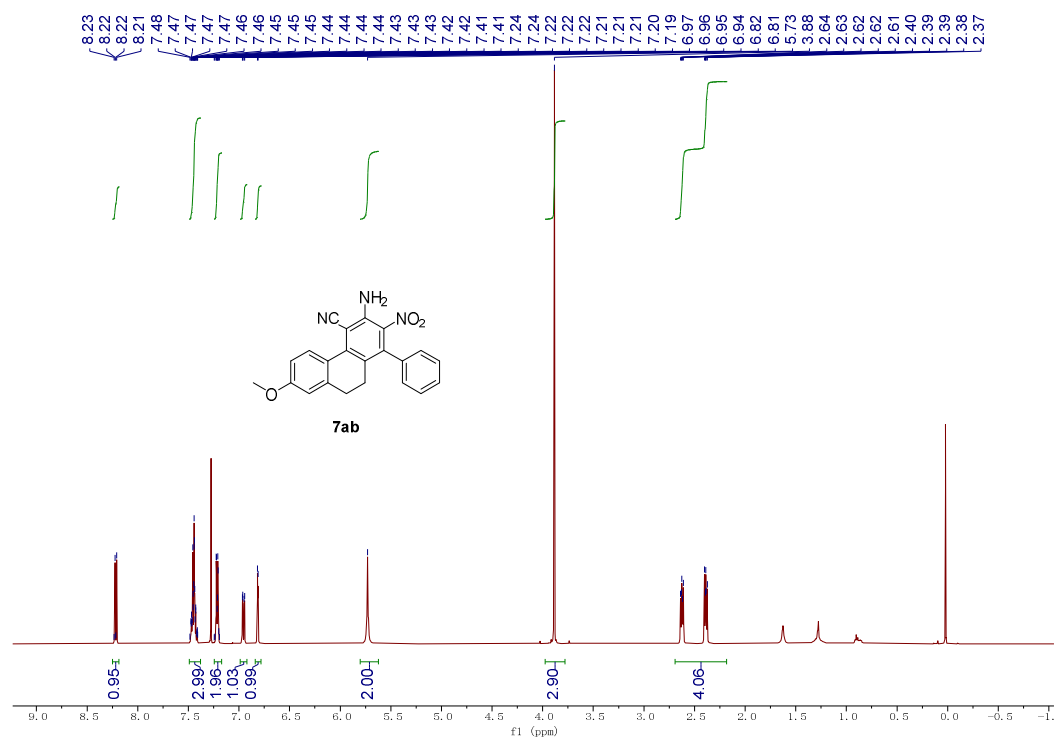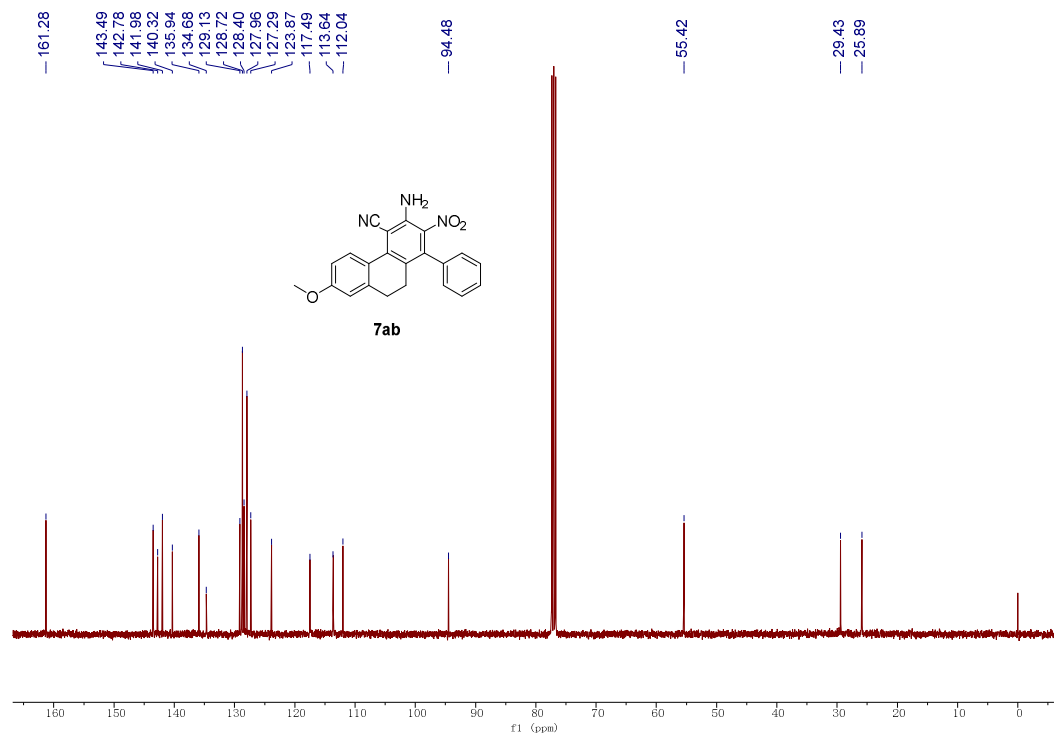

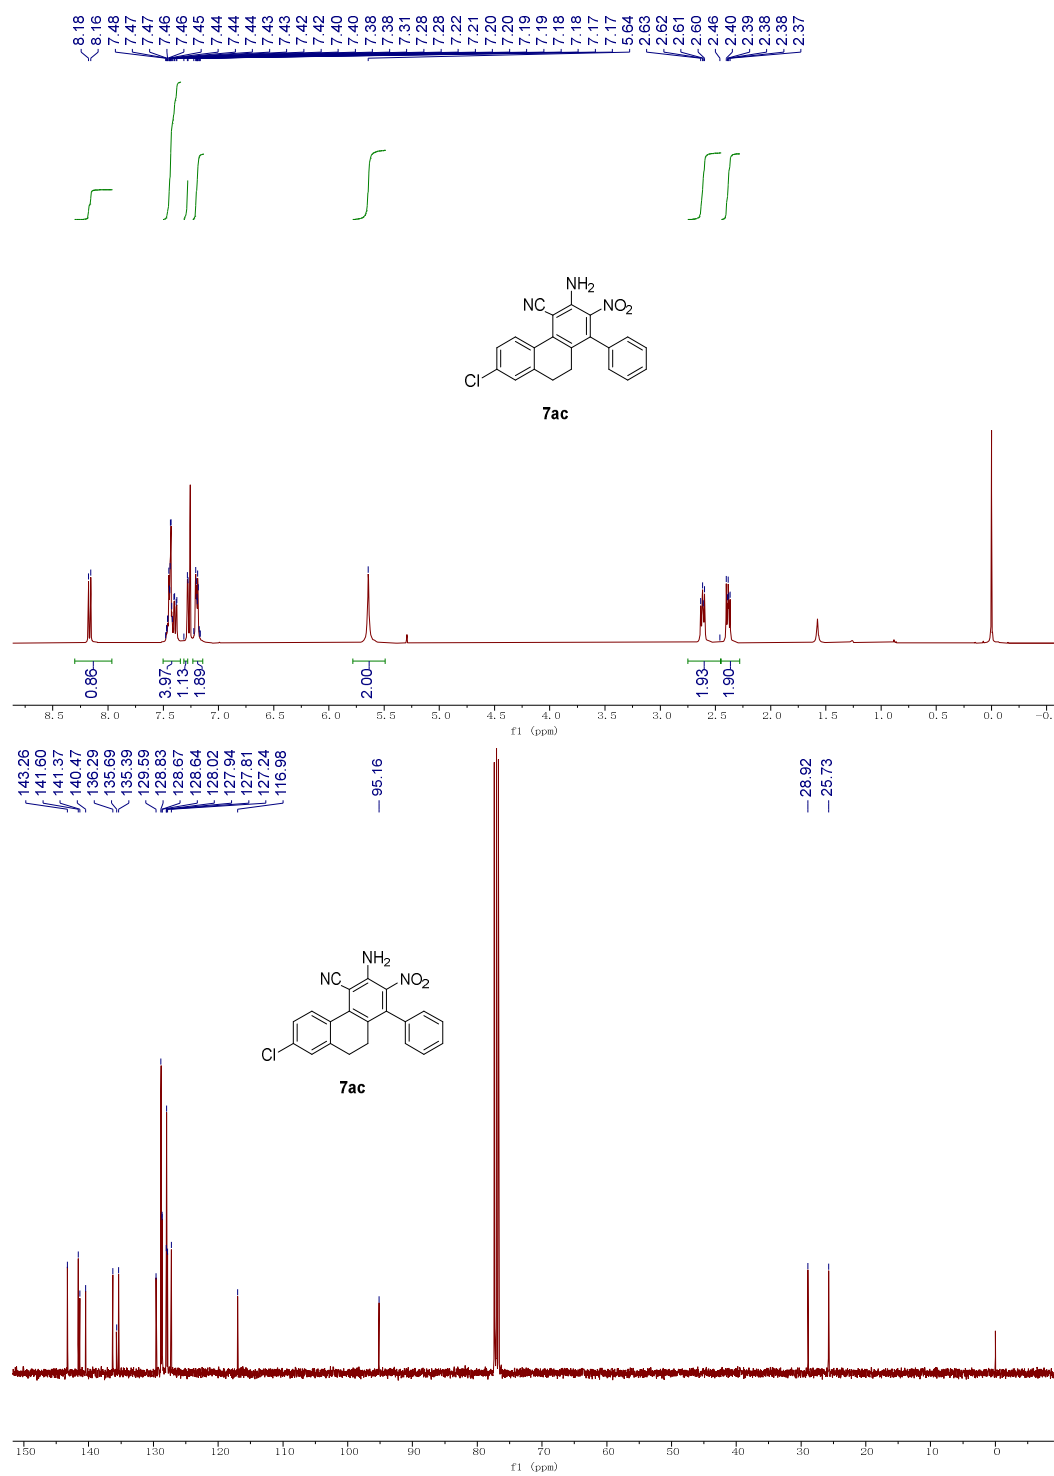

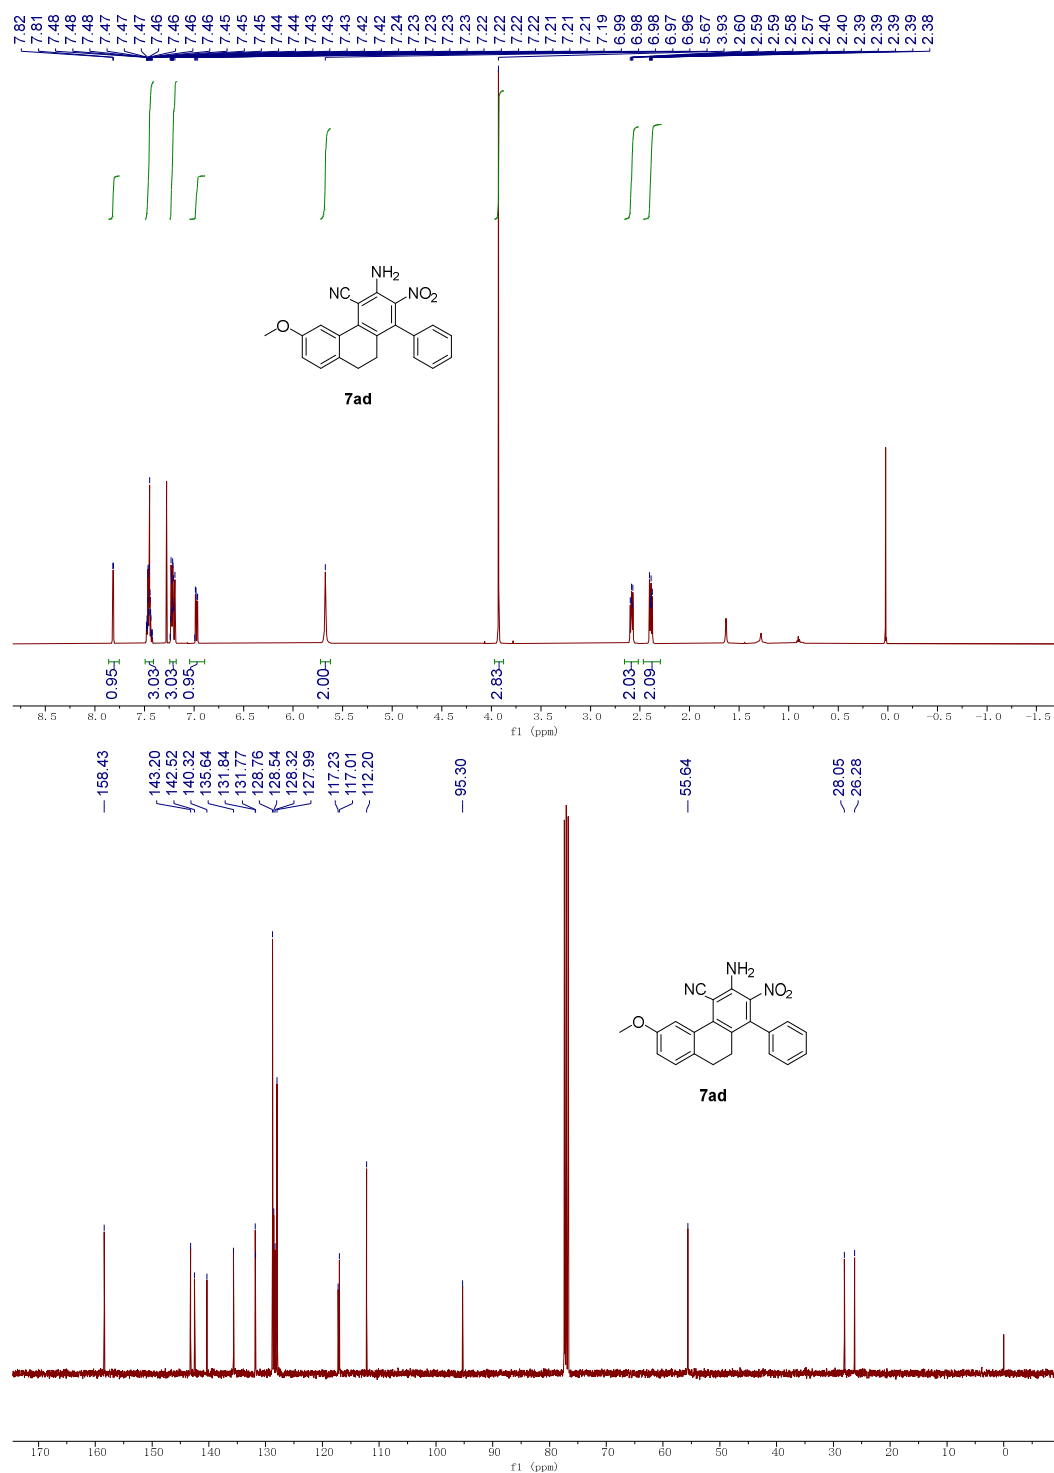

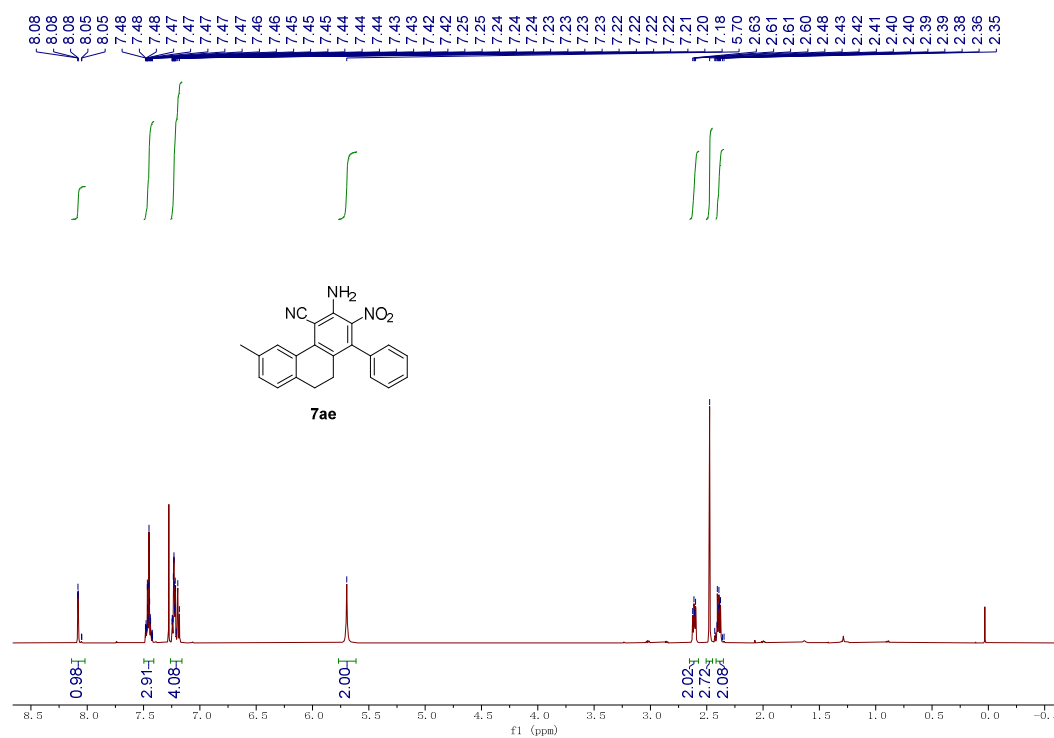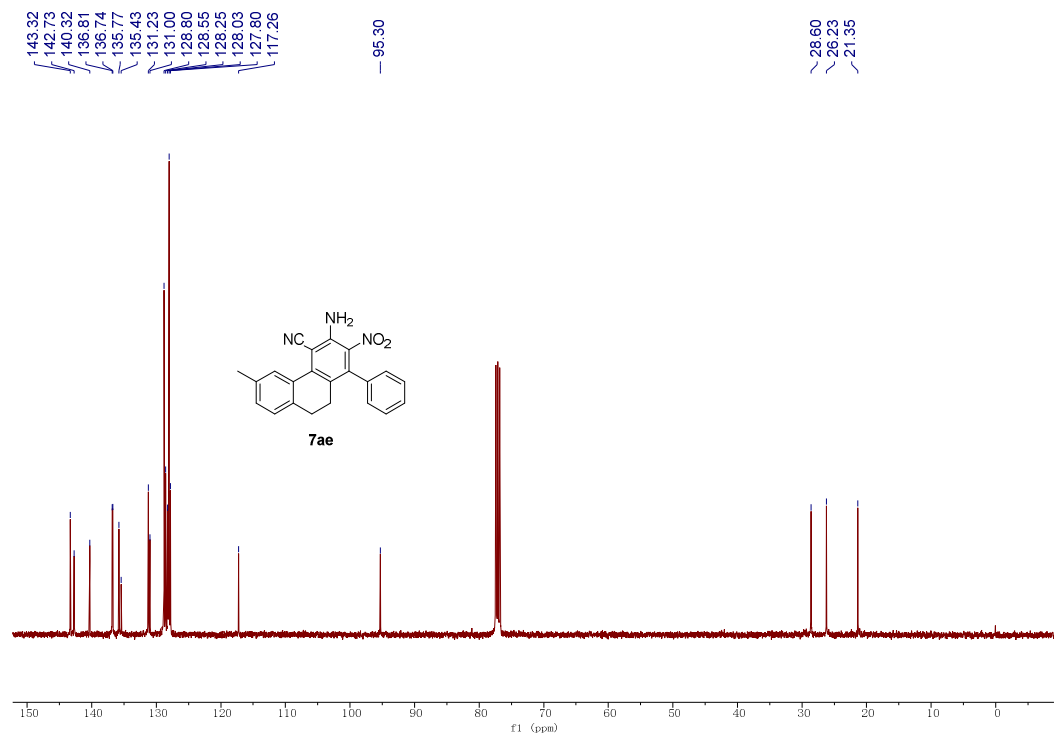



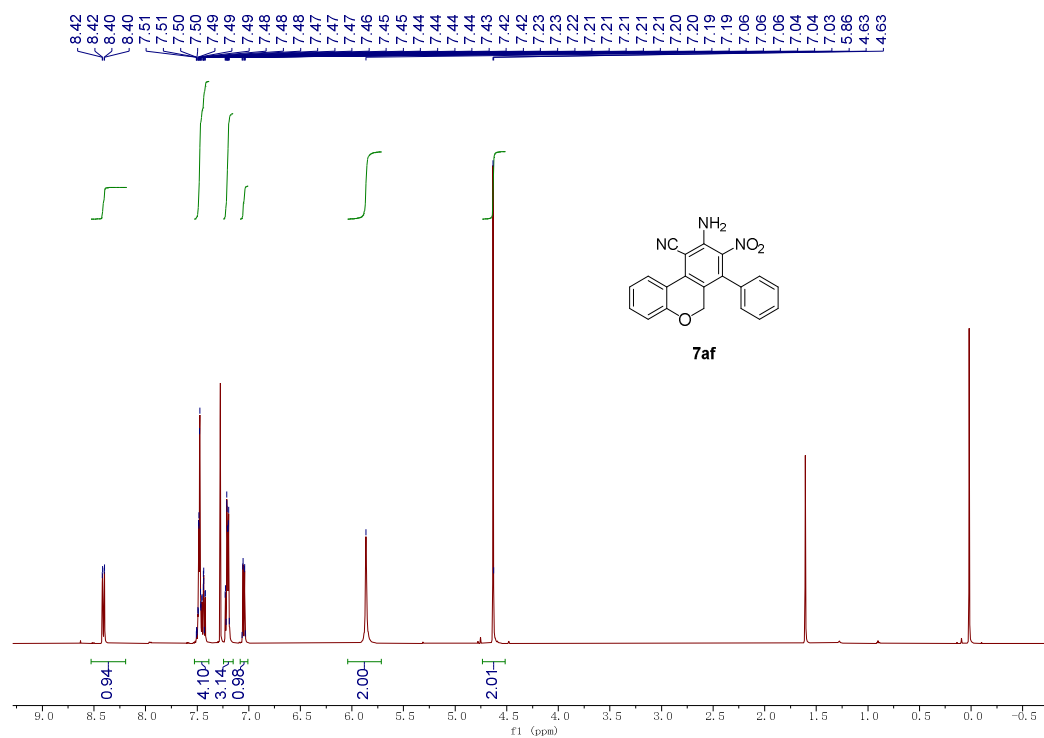

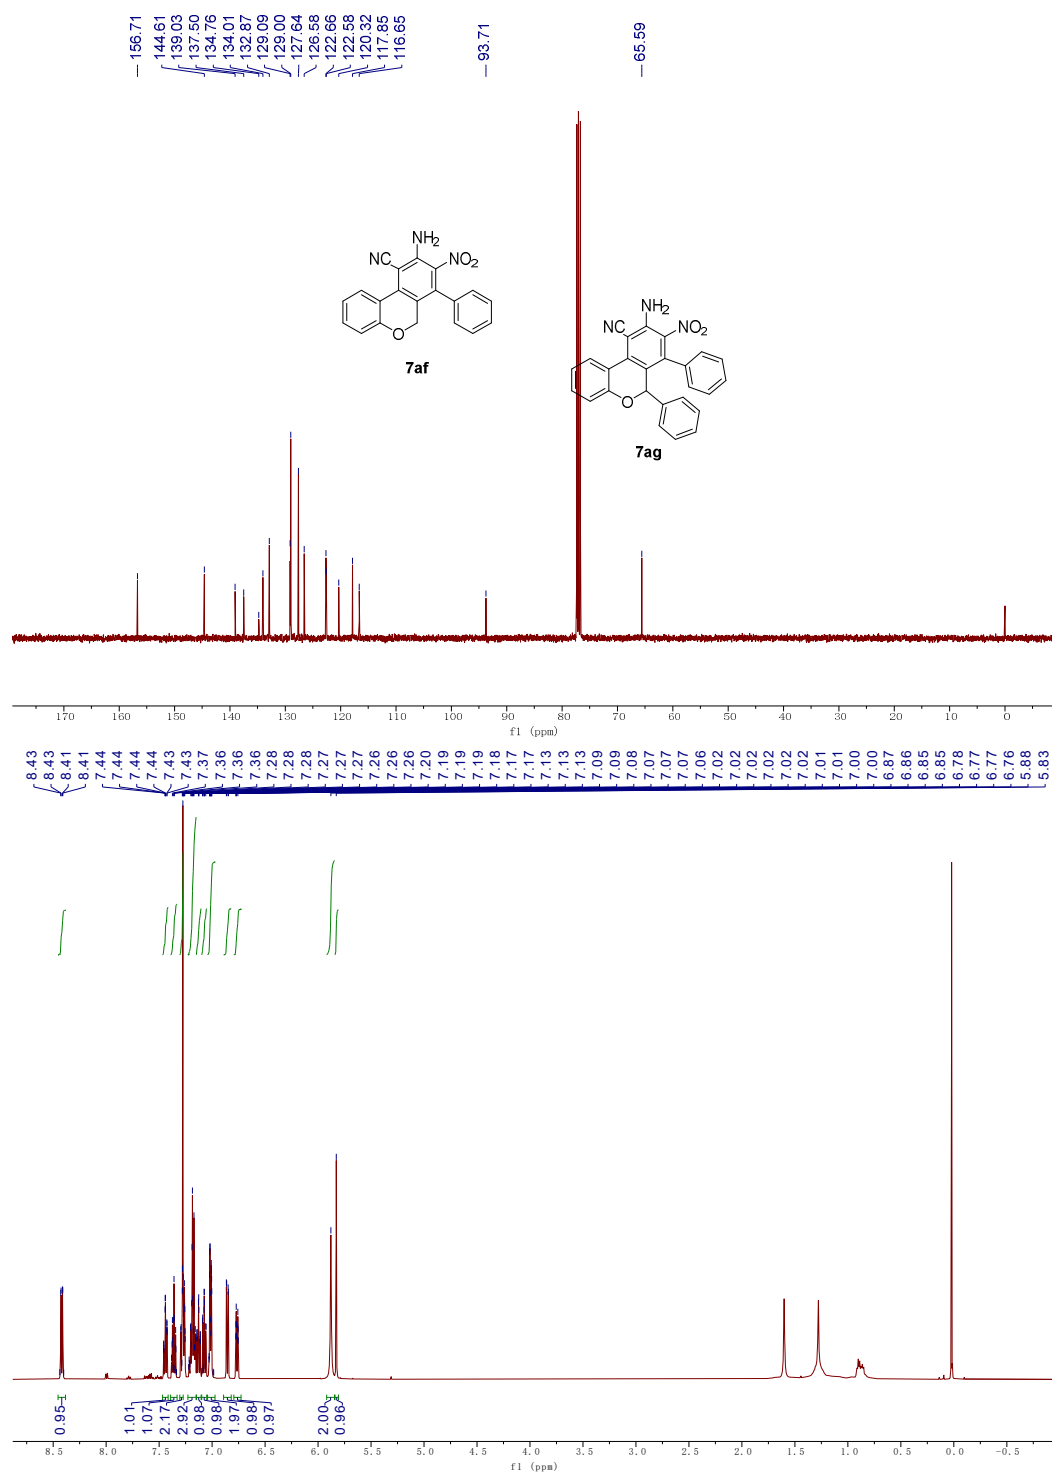

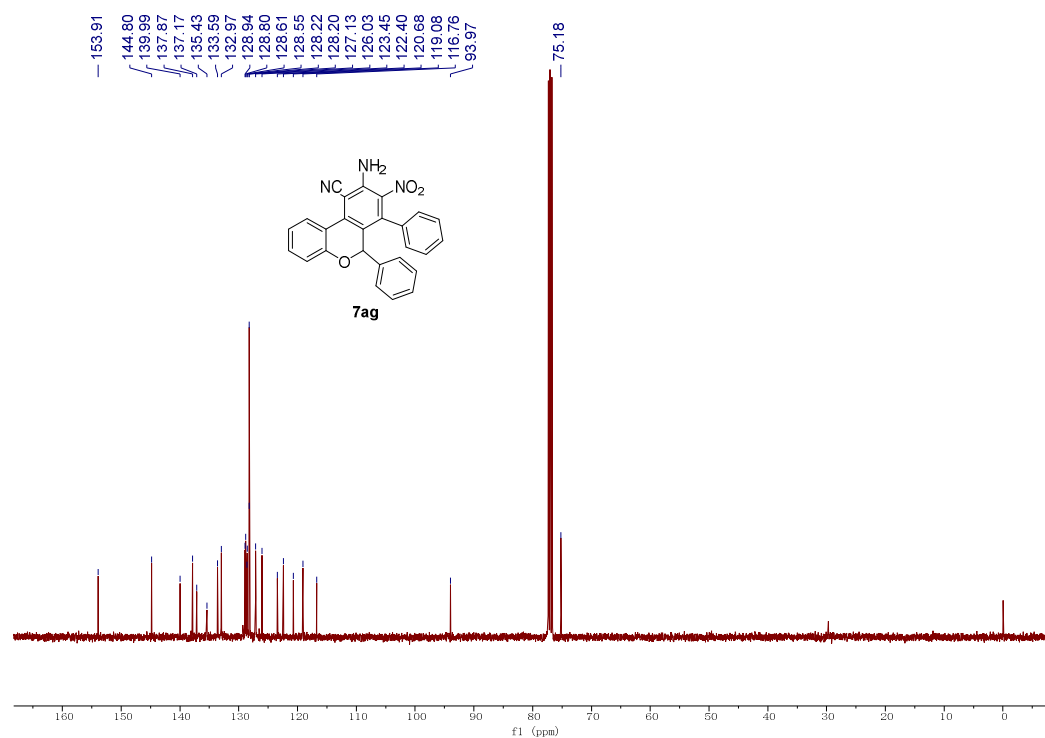

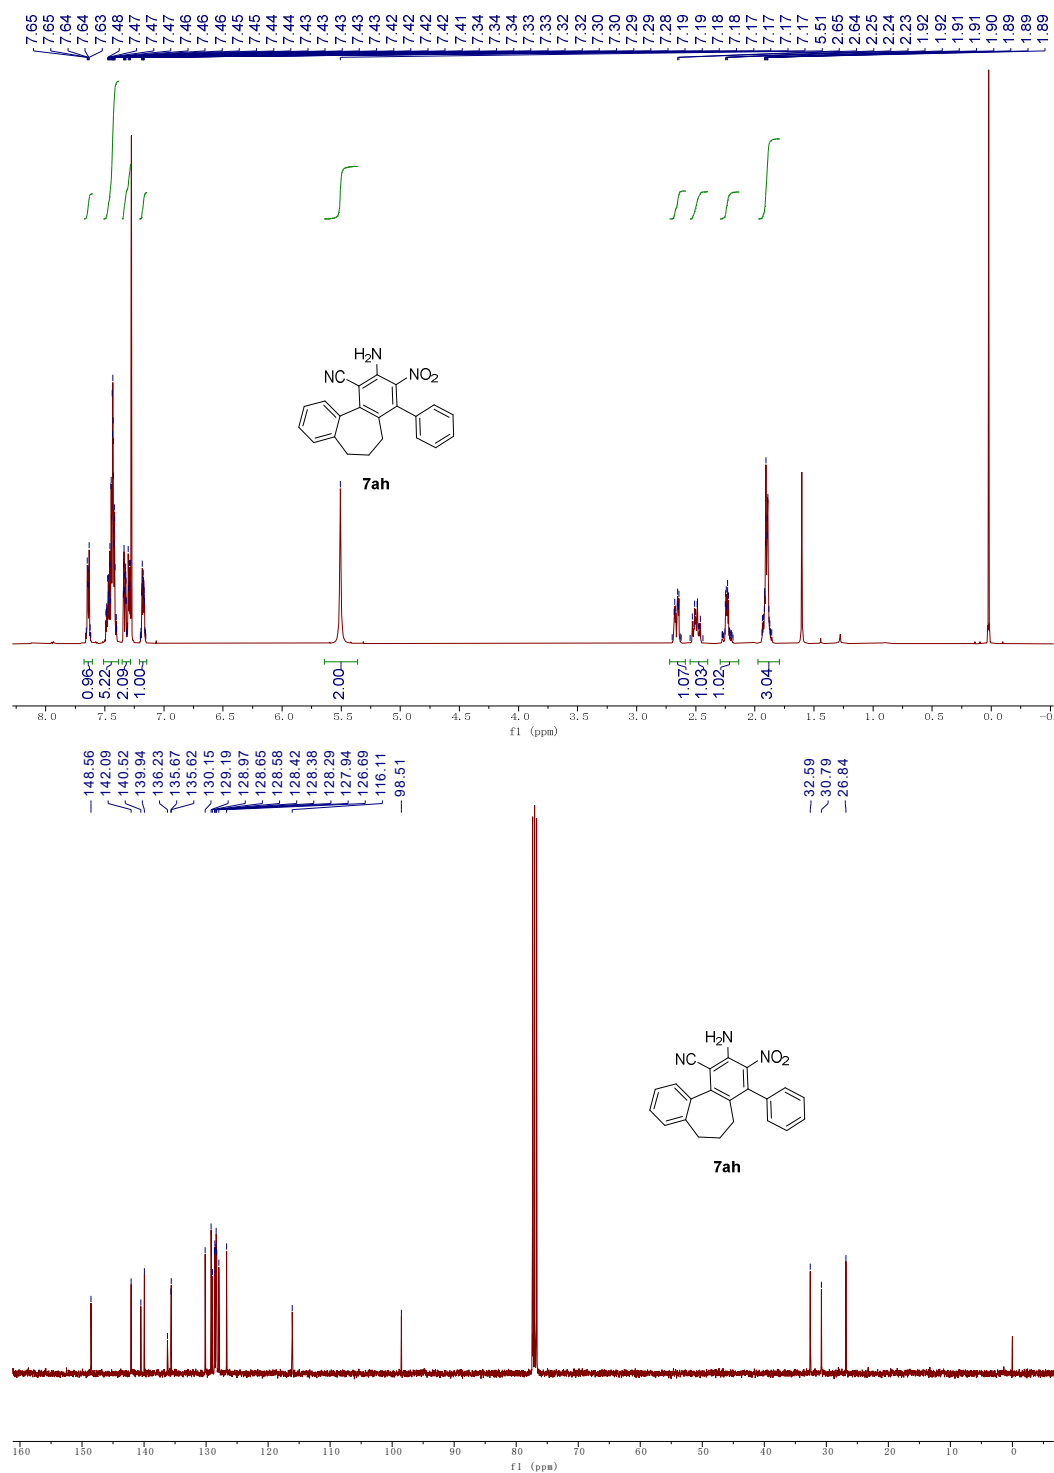

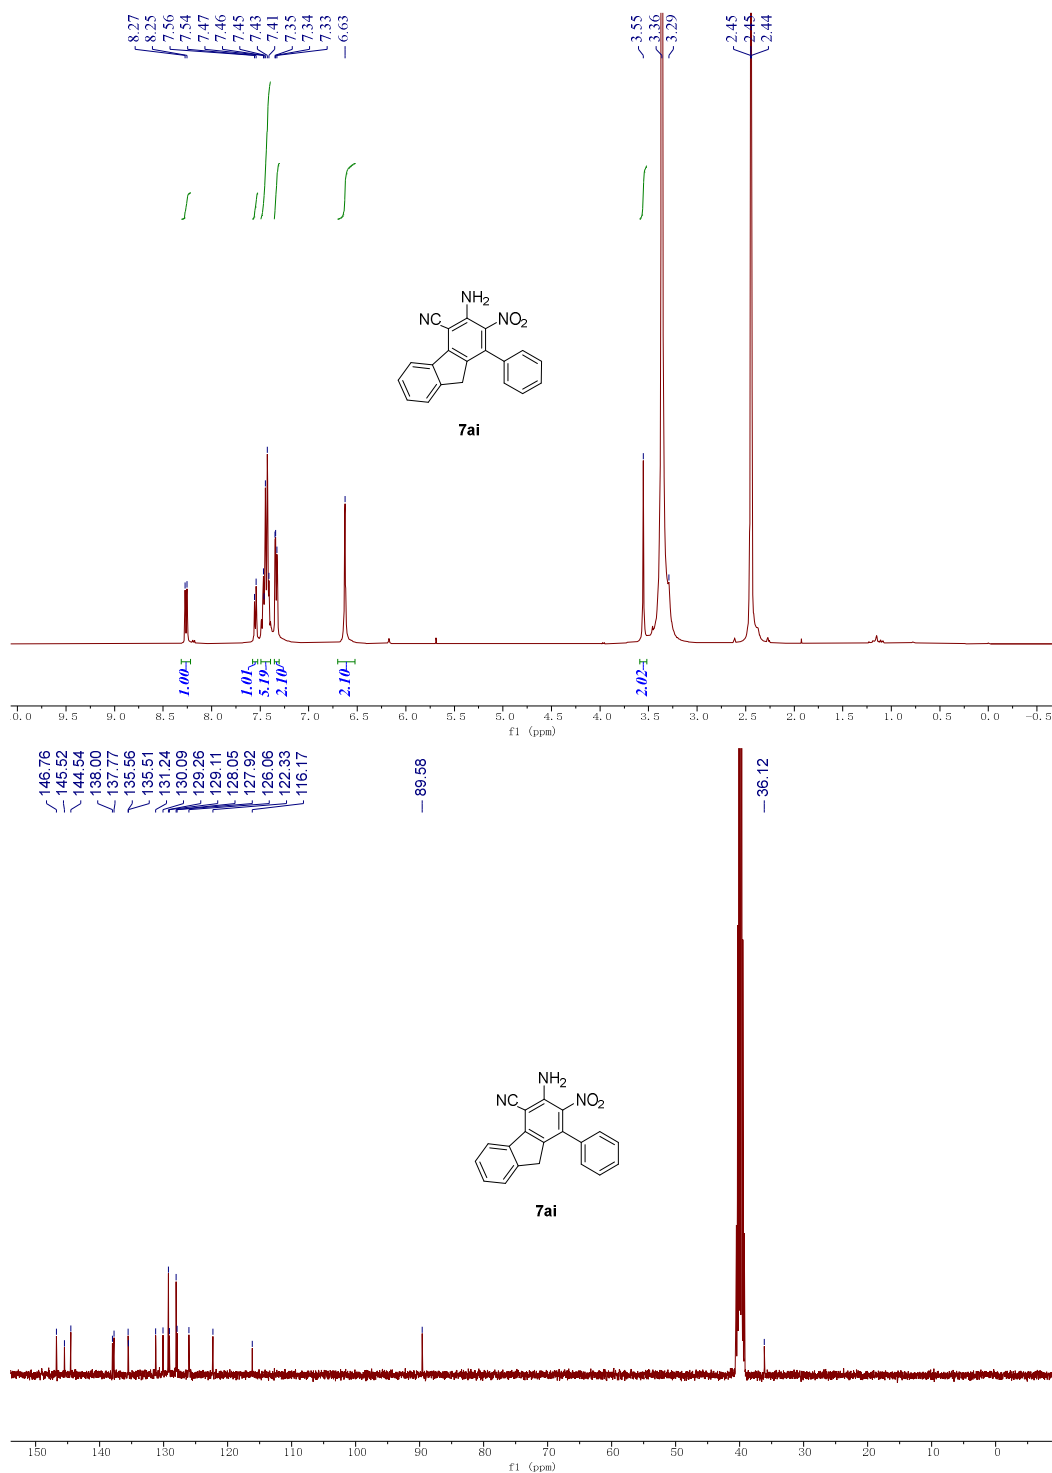

#### 4. Reference

1. Pan, H.; Han, M.-Y.; Li, P.; Wang, L. "On Water" Direct Catalytic Vinylogous Aldol Reaction of Silyl Glyoxylates. *J. Org. Chem.* **2019**, *84*, 14281–14290.
2. Bauvois, B.; Puiffe, M.-L.; Bongui, J.-B.; Paillat, S.; Monneret, C.; Dauzonne, D. Synthesis and biological evaluation of novel flavone-8-acetic acid derivatives as reversible inhibitors of aminopeptidase N/CD13. *J. Med. Chem.* **2003**, *46*, 3900–3913.
3. Yang, W.; Du, D.-M. Highly enantioselective Michael addition of nitroalkanes to chalcones using chiral squaramides as hydrogen bonding organocatalysts. *Org. Lett.* **2010**, *12*, 5450–5453.
4. Requena, J. V.A.; Lopez, E.M.; Herrera, R. P. One-pot synthesis of unsymmetrical squaramides. *RSC Adv.* **2015**, *5*, 33450–33462.
